# Supplementary material for: Separation of Dihydro-Isocoumarins and Dihydro-Stilbenoids from Hydrangea macrophylla ssp. serrata by Use of Counter-Current Chromatography
Source: MDPI journal article supplement (doi:10.3390/molecules27113424), 2022-05-26
Supplement: s1 [file s1]

## Supplemental File S5: NMR and mass spectrometry of secoiridoid glycosides

Table E1: NMR assignments of deoxyloganic acid (20)

| No   | $\delta_H$ (Multiplicity, J, nH) | $\delta_C$ | HMBC                                                   |
|------|----------------------------------|------------|--------------------------------------------------------|
| 1    | 5.07 (m, 1H)                     | 95.9       | 33.8(5), 98.7(A1), 150.6(3)                            |
| 3    | 7.34 (s, 1H)                     | 150.6      | 33.8(5), 95.9(1), 111.4(4), 168.1(11)                  |
| 4    | -                                | 111.4      | -                                                      |
| 5    | 2.74 (td, 7.4, 7.2 Hz, 1H)       | 33.8       | 31.9(6), 47.2(9), 95.9(1), 111.4(4), 150.6(3)          |
| 6a   | 2.09 (m, 1H)                     | 31.9       | -                                                      |
| 6b   | 1.31 (m, 1H)                     | 31.9       | 32.6(7), 33.8(5), 111.4(4)                             |
| 7a   | 1.79 (m 1H)                      | 32.6       | -                                                      |
| 7b   | 1.11 (m 1H)                      | 32.6       | 20.5(10)                                               |
| 8    | 1.88 (m, 1H)                     | 34.8       | 20.5(10), 32.6(7), 47.2(9), 95.9(1)                    |
| 9    | 1.63 (dt, 8.2, 6.2 Hz, 1H)       | 47.2       | 20.5(10), 31.9(6), 33.8(5), 34.8(8), 95.9(1), 111.4(4) |
| 10   | 1.02 (d, 6.8 Hz, 3H)             | 20.5       | 32.6(7), 34.8(8), 47.2(9)                              |
| 11   | -                                | 168.1      | -                                                      |
| A1   | 4.49 (d, 7.8 Hz, 1H)             | 98.7       | 95.9(1)                                                |
| A2   | 2.98 (m, 1H)                     | 73.1       | 76.8(A3), 95.9(A1)                                     |
| A3   | 3.17 (m, 1H)                     | 76.8       | -                                                      |
| A4   | 3.04 (m, 1H)                     | 70.1       | -                                                      |
| A5   | 3.17 (m, 1H)                     | 77.3       | -                                                      |
| A6'  | 3.68 (m, 1H)                     | 61.2       | -                                                      |
| A6'' | 3.44 (m, 1H)                     | 61.2       | -                                                      |

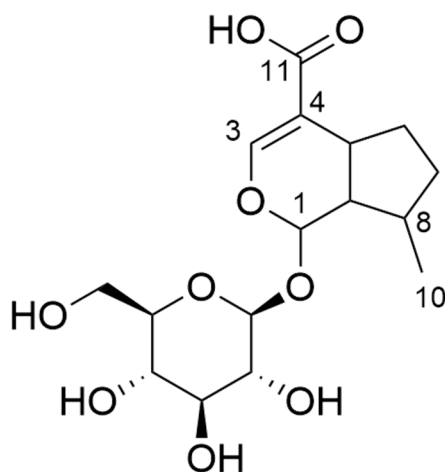

deoxyloganic acid (20)

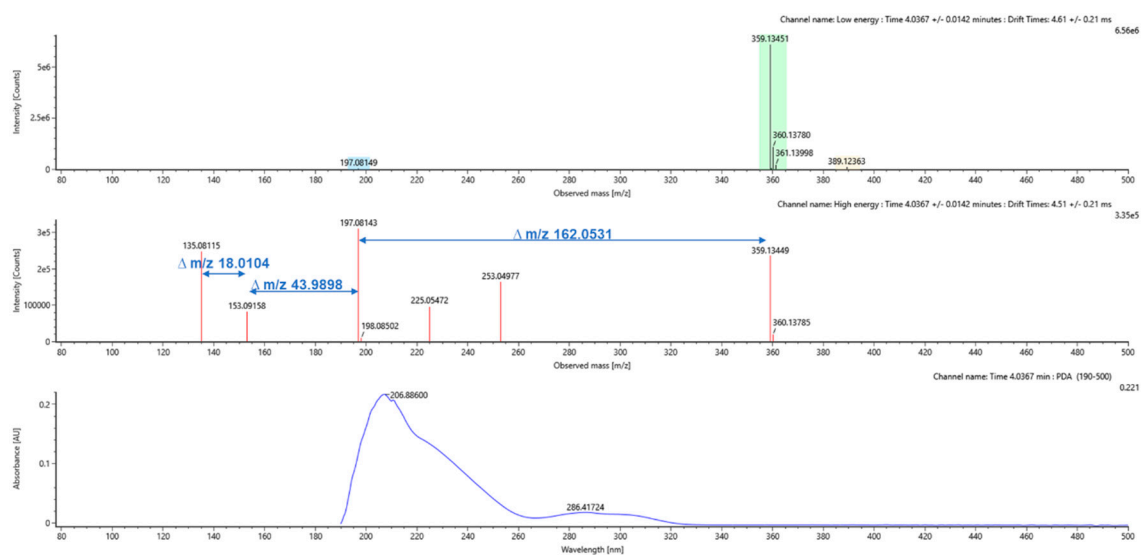

Figure E1: mass and UV-spectra of deoxyloganic acid (20)

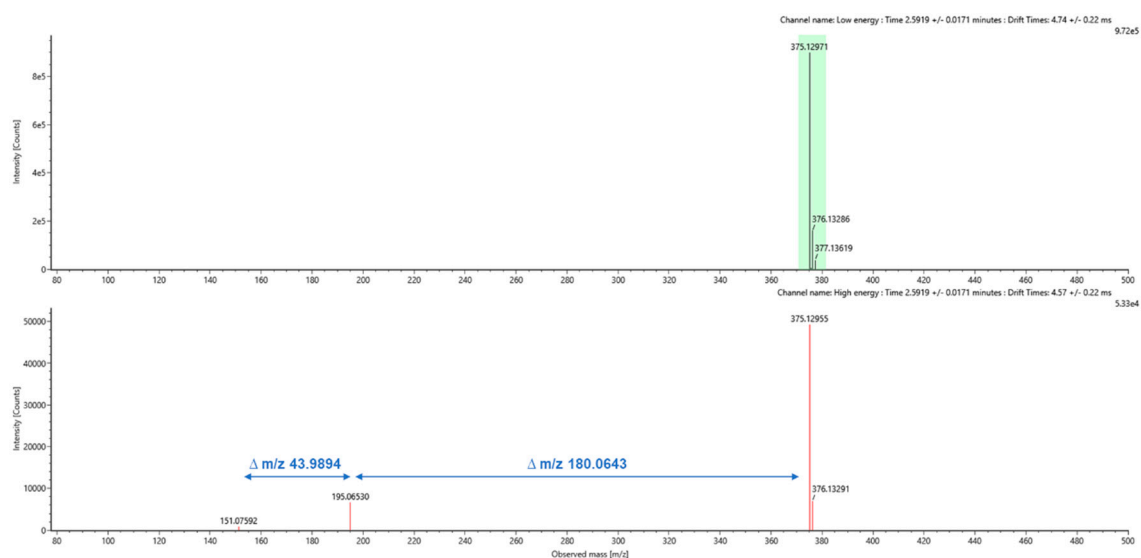

Figure E2: mass spectrum of loganic acid (21)

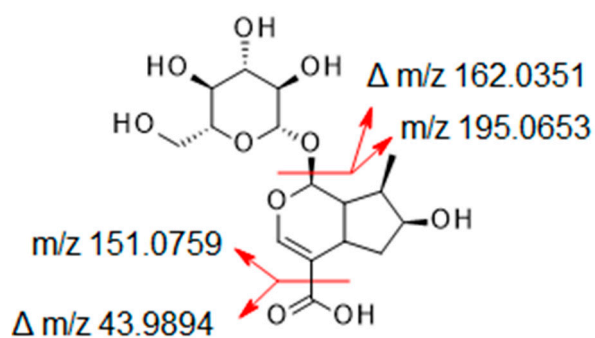

Figure E3: fragmentation loganic acid (21)

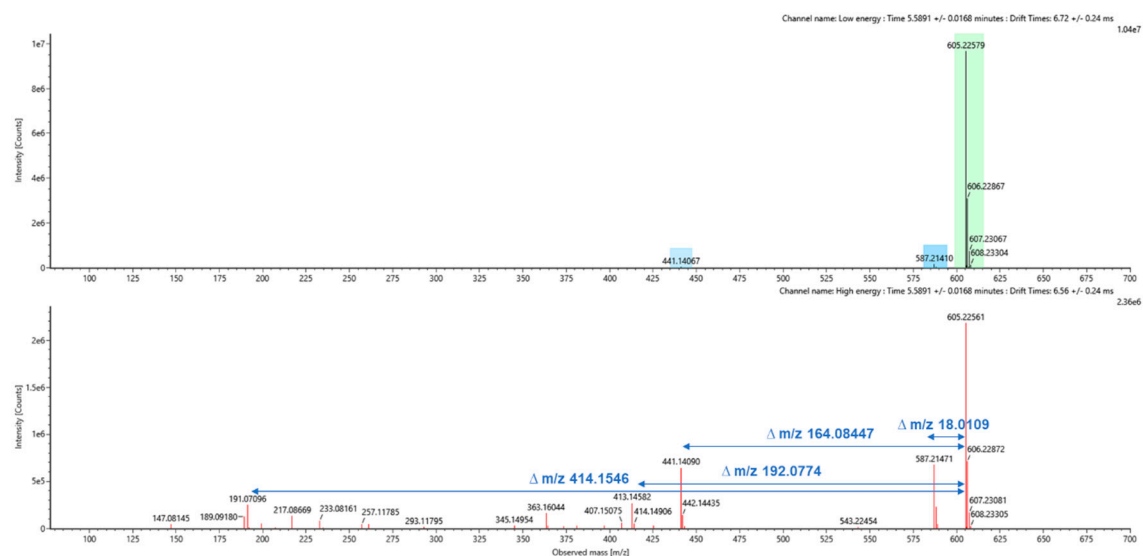

Figure E4: mass spectrum of hydramacroside B (22)

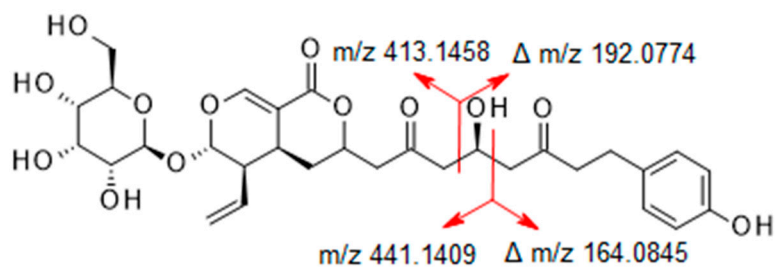

Figure E5: fragmentation hydramacroside B (22)

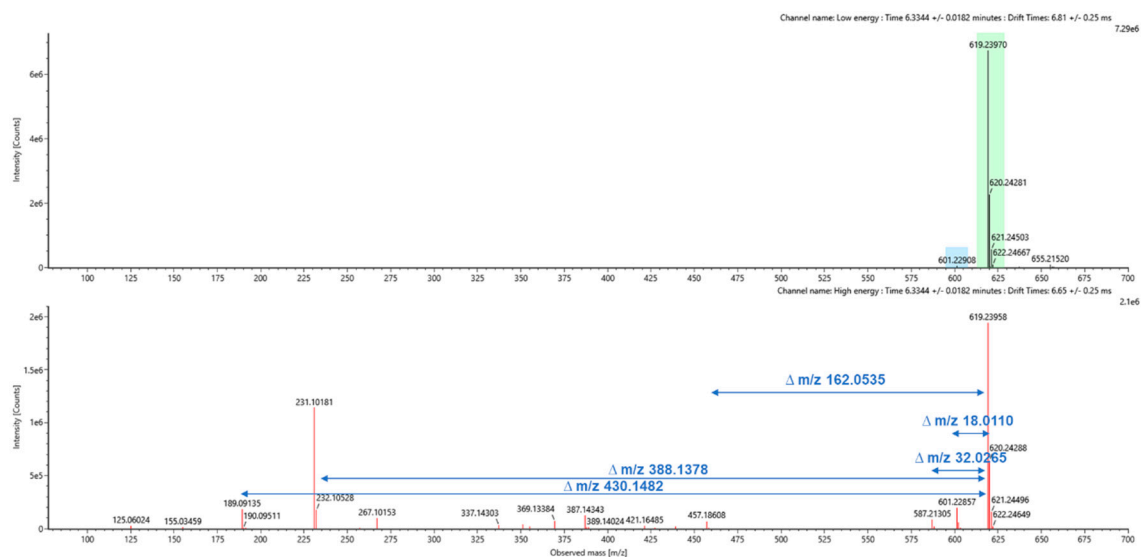

Figure E6: mass spectrum of hydrangenoside A (23)

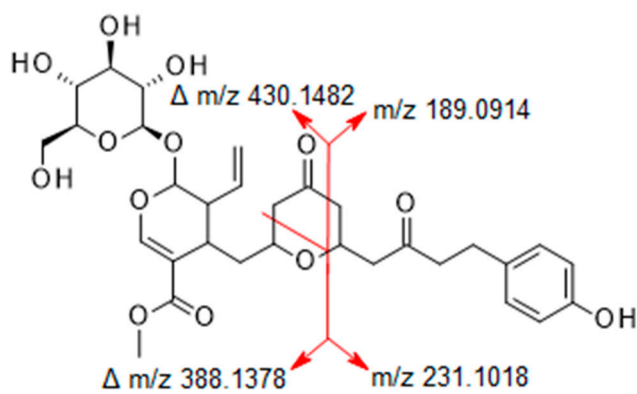

Figure E7: fragmentation hydrangenoside A (23)
