# Supplementary material for: Separation of Dihydro-Isocoumarins and Dihydro-Stilbenoids from Hydrangea macrophylla ssp. serrata by Use of Counter-Current Chromatography
Source: MDPI journal article supplement (doi:10.3390/molecules27113424), 2022-05-26
Supplement: s1 [file s1]

## Supplemental File S4: NMR and mass spectrometry of taxiphyllin

Table D1: NMR assignments taxiphyllin (19)

| No  | $\delta_H$ (Multiplicity, J, nH) | $\delta_C$ | HMBC                                                 |
|-----|----------------------------------|------------|------------------------------------------------------|
| 1   | -                                | 118.9      | -                                                    |
| 2   | 5.89 (s, 1H)                     | 66         | 100.0(A1), 118.9(1), 123.5(1'), 129.3(2'), 129.3(6') |
| 7   | 9.82 (s, 1H)                     | -          | -                                                    |
| 1'  | -                                | 123.5      | -                                                    |
| 2'  | 7.35 (m, 1H)                     | 129.3      | 66.0(2), 158.5(4')                                   |
| 3'  | 6.83 (m, 1H)                     | 115.5      | 123.5(1'), 158.5(4')                                 |
| 4'  | -                                | 158.5      | -                                                    |
| 5'  | 6.83 (m, 1H)                     | 115.5      | 123.5(1'), 158.5(4')                                 |
| 6'  | 7.35 (m, 1H)                     | 129.3      | 66.0(2), 158.5(4')                                   |
| A1  | 4.11 (d, 7.1, 1H)                | 100        | 66.0(2)                                              |
| A2  | 3.05 (m, 1H)                     | 73         | -                                                    |
| A3  | 3.05 (m, 1H)                     | 76.5, 77.1 | -                                                    |
| A4  | 3.05 (m, 1H)                     | 69.8       | -                                                    |
| A5  | 3.05 (m, 1H)                     | 76.5, 77.1 | -                                                    |
| A6a | 3.67 (m, 1H)                     | 61.1       | 69.8(A4)                                             |
| A6b | 3.52 (m, 1H)                     | 61.1       | -                                                    |

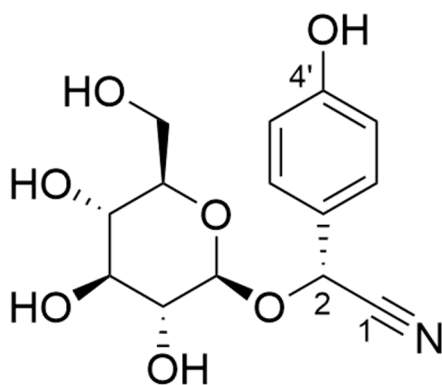

Taxiphyllin (19)

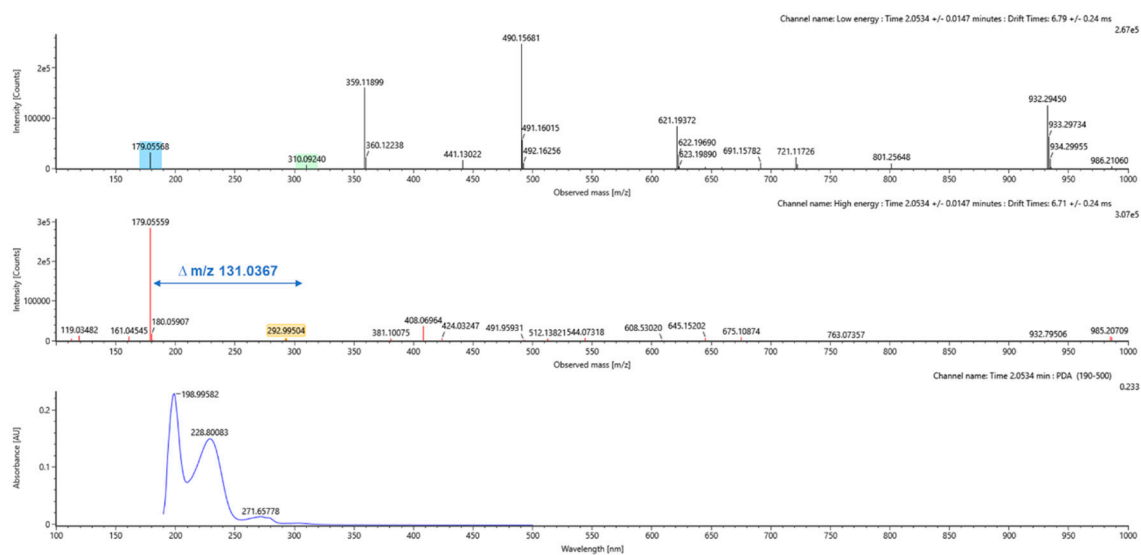

Figure D1: mass and UV-spectra of taxiphyllin (19)
