# Supplementary material for: Separation of Dihydro-Isocoumarins and Dihydro-Stilbenoids from Hydrangea macrophylla ssp. serrata by Use of Counter-Current Chromatography
Source: MDPI journal article supplement (doi:10.3390/molecules27113424), 2022-05-26
Supplement: s1 [file s1]

## Supplemental File S2: NMR and mass spectrometry of dihydrostilbenic acids

Table B1: NMR assignments of cudrabibenzyl A and 2,4-Dihydroxy-6-[2-(4-hydroxyphenyl)ethyl]benzoic acid

|     | cudrabibenzyl A                  |            |                                                    | 2,4-dihydroxy-6-[2-(4-hydroxyphenyl)ethyl]benzoic acid |            |                                                    |
|-----|----------------------------------|------------|----------------------------------------------------|--------------------------------------------------------|------------|----------------------------------------------------|
| No  | $\delta_H$ (Multiplicity, J, nH) | $\delta_C$ | HMBC                                               | $\delta_H$ (Multiplicity, J, nH)                       | $\delta_C$ | HMBC                                               |
| 1   | -                                | 108.8      | -                                                  | -                                                      | 109.7      | -                                                  |
| 2   | -                                | 165.8      | -                                                  | -                                                      | 166.4      | -                                                  |
| 3   | 6.47 (m, 1H)                     | 103        | 108.8(1), 112.2(5), 162.5(4), 165.8(2)             | 5.89 (m, 1H)                                           | 100.4      | 107.2(5), 109.7(1), 158.8(4), 166.4(2)             |
| 4   | -                                | 162.5      | -                                                  | -                                                      | 158.8      | -                                                  |
| 5   | 6.40 (m, 1H)                     | 112.2      | 40.1(7), 103.0(3), 108.8(1), 162.5(4)              | 5.88 (m, 1H)                                           | 107.2      | 38.1(7), 100.4(3), 109.7(1)                        |
| 6   | -                                | 148.7      | -                                                  | -                                                      | 146.6      | -                                                  |
| 7a  | 3.22 (m, 1H)                     | 40.1       | 38.4(8), 112.2(5), 148.7(6)                        | 3.13 (m, 2H)                                           | 38.1       | 37.1(8), 107.2(5), 109.7(1), 133.1(1'), 146.6(6)   |
| 7b  | 3.11 (m, 1H)                     | 40.1       | 38.4(8), 112.2(5), 148.7(6)                        | -                                                      | -          | -                                                  |
| 8   | 2.76 (m, 2H)                     | 38.4       | 40.1(7), 130.4(2'), 130.4(6'), 134.4(1'), 148.7(6) | 2.63 (m, 2H)                                           | 37.1       | 38.1(7), 129.1(6'), 129.1(2'), 133.1(1'), 146.6(6) |
| 9   | -                                | 174.6      | -                                                  | -                                                      | 172.4      | -                                                  |
| 1'  | -                                | 134.4      | -                                                  | -                                                      | 133.1      | -                                                  |
| 2'  | 7.01 (m, 1H)                     | 130.4      | 38.4(8), 156.3(4')                                 | 7.04 (m, 1H)                                           | 129.1      | 37.1(8), 155.0(4')                                 |
| 3'  | 6.69 (m, 1H)                     | 116.0      | 134.4(1'), 156.3(4')                               | 6.65 (m, 1H)                                           | 114.8      | 133.1(1'), 155.0(4')                               |
| 4'  | -                                | 156.3      | -                                                  | -                                                      | 155.0      | -                                                  |
| 5'  | 6.69 (m, 1H)                     | 116        | 134.4(1'), 156.3(4')                               | 6.65 (m, 1H)                                           | 114.8      | 133.1(1'), 155.0(4')                               |
| 6'  | 7.01 (m, 1H)                     | 130.4      | 38.4(8), 156.3(4')                                 | 7.04 (m, 1H)                                           | 129.1      | 37.1(8), 155.0(4')                                 |
| A1  | 4.87 (d, 7.6 Hz, 1H)             | 101.4      | 162.5(4)                                           |                                                        |            |                                                    |
| A2  | 3.45 (m, 1H)                     | 74.7       | -                                                  |                                                        |            |                                                    |
| A3  | 3.49 (m, 1H)                     | 77.8       | 71.2(A4), 74.7(A2)                                 |                                                        |            |                                                    |
| A4  | 3.40 (dd, 9.7, 8.5 Hz, 1H)       | 71.2       | 62.3(A6)                                           |                                                        |            |                                                    |
| A5  | 3.45 (m, 1H)                     | 78.1       | -                                                  |                                                        |            |                                                    |
| A6a | 3.89 (dd, 12.2, 2.3 Hz, 1H)      | 62.3       | 71.2(A4)                                           |                                                        |            |                                                    |
| A6b | 3.71 (dd, 12.2, 5.4 Hz, 1H)      | 62.3       | 78.1(A5)                                           |                                                        |            |                                                    |

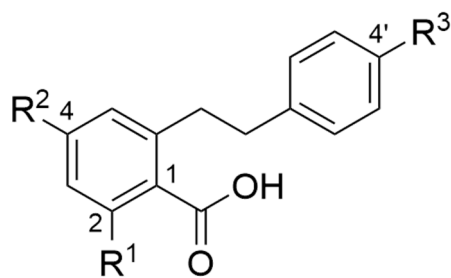

Cubrabibenzyl A (**14**) R1: OH, R2: O- $\beta$ -Glc, R3: OH

2,4-dihydroxy-6-[2-(4-hydroxyphenyl)ethyl]benzoic acid (**15**) R1: OH, R2: OH, R3: OH

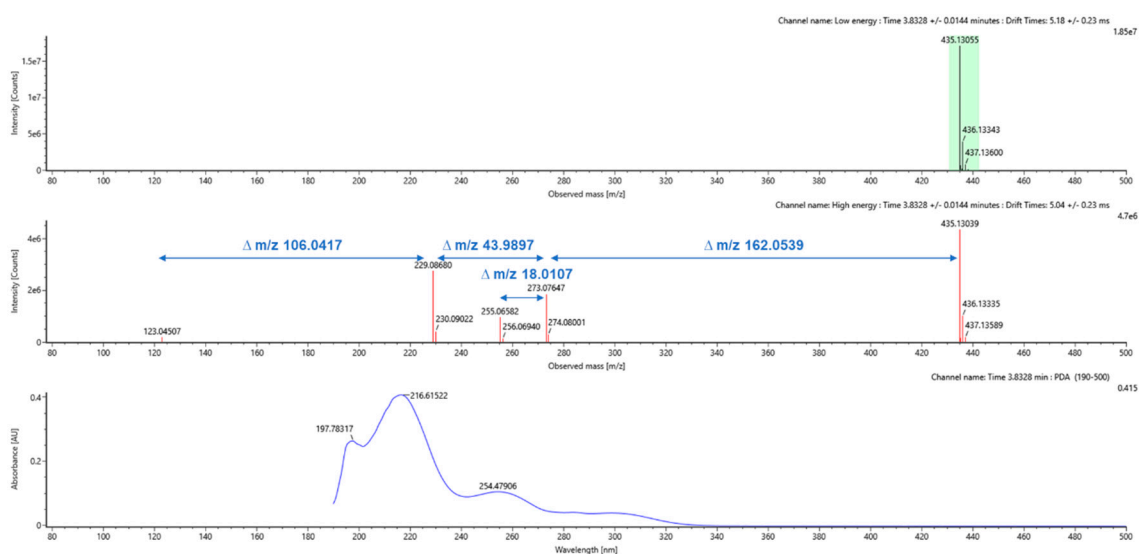

Figure B1: mass and UV-spectra of cudrabibenzyl A (**14**)

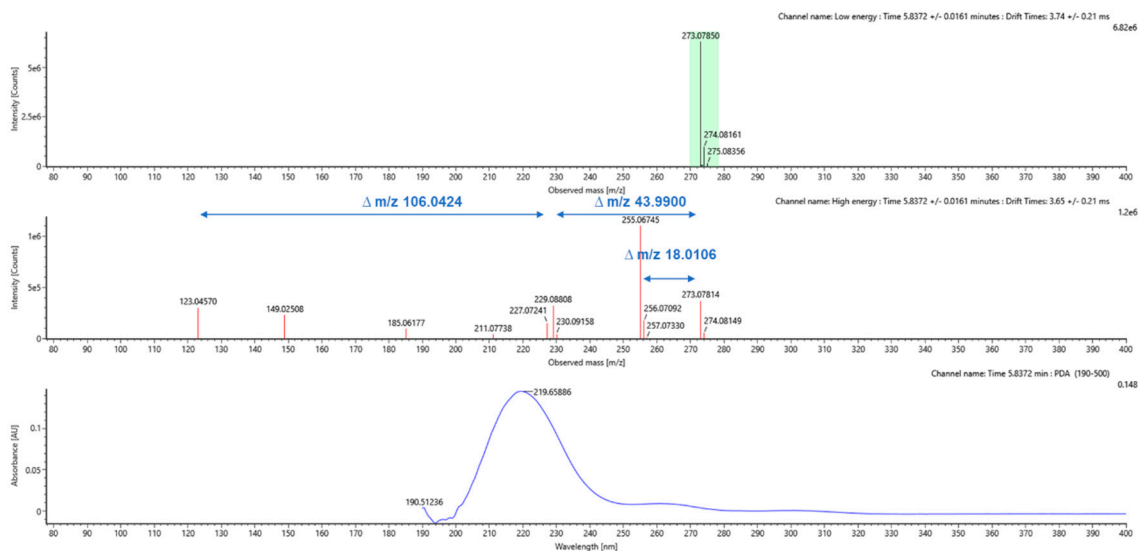

Figure B2: mass and UV spectra of 2,4-dihydroxy-6-[2-(4-hydroxyphenyl)ethyl]benzoic acid (**15**)
