# Supplementary material for: Separation of Dihydro-Isocoumarins and Dihydro-Stilbenoids from Hydrangea macrophylla ssp. serrata by Use of Counter-Current Chromatography
Source: MDPI journal article supplement (doi:10.3390/molecules27113424), 2022-05-26
Supplement: s1 [file s1]

**Supplemental File S3: NMR and mass spectrometry of dihydrostilbenes and a related substance**

*Table C1: NMR assignments of lunularin-4'-O-glucoside (16) and dihydroresveratrol-3-O-glucoside (17)*

| No  | lunularin-4'-O-glucoside (16)    |            |                                 | dihydroresveratrol-3-O-glucoside (17) |            |                                 |
|-----|----------------------------------|------------|---------------------------------|---------------------------------------|------------|---------------------------------|
|     | $\delta_H$ (Multiplicity, J, nH) | $\delta_C$ | HMBC                            | $\delta_H$ (Multiplicity, J, nH)      | $\delta_C$ | HMBC                            |
| 1   | -                                | 142.9      | -                               | -                                     | 143.7      | -                               |
| 2   | 6.60 (s, 1H)                     | 115.3      | 37.3(7)                         | 6.34 (s, 1H)                          | 107.1      | 37.6(7), 101.1(4), 109.1(6)     |
| 3   | -                                | 157.4      | -                               | -                                     | 158.5      | -                               |
| 4   | 6.55 (d, 8.0 Hz, 1H)             | 112.8      | 118.9(6)                        | 6.26 (s, 1H)                          | 101.1      | -                               |
| 5   | 7.04 (t, 8.0, 7.4 Hz, 1H)        | 129.1      | 142.9(1), 157.4(3)              | -                                     | 158.1      | -                               |
| 6   | 6.61 (d, 7.6 Hz, 1H)             | 118.9      | 37.3(7), 115.3(2)               | 6.26 (s, 1H)                          | 109.1      | -                               |
| 7   | 2.74 (m, 2H)                     | 37.3       | 36.1(8)                         | 2.7 (m, 2H)                           | 37.6       | 131.6(1'), 143.7(1)             |
| 8   | 2.79 (m, 2H)                     | 36.1       | 37.3(7)                         | 2.7 (m, 2H)                           | 35.9       | 129.1(6'), 129.1(2'), 131.6(1') |
| 1'  | -                                | 134.8      | -                               | -                                     | 131.6      | -                               |
| 2'  | 7.11 (m, 1H)                     | 129.1      | 36.1(8), 155.7(4')              | 7.00 (m, 1H)                          | 129.1      | 129.1(6'), 155.4(4')            |
| 3'  | 6.92 (m, 1H)                     | 116.0      | 116.0(3'), 134.8(1'), 155.7(4') | 6.64 (m, 1H)                          | 115.0      | 115.0(5'), 131.6(1'), 155.4(4') |
| 4'  | -                                | 155.7      | -                               | -                                     | 155.4      | -                               |
| 5'  | 6.92 (m, 1H)                     | 116        | 116.0(3'), 134.8(1'), 155.7(4') | 6.64 (m, 1H)                          | 115        | 115.0(3'), 131.6(1'), 155.4(4') |
| 6'  | 7.11 (m, 1H)                     | 129.1      | 36.1(8), 155.7(4')              | 7.00 (m, 1H)                          | 129.1      | 35.9(8), 129.1(2'), 155.4(4')   |
| A1  | 4.81 (d, 7.7 Hz, 1H)             | 100.6      | 155.7(4')                       | 4.73 (d, 7.7 Hz, 1H)                  | 100.5      | 158.5(3)                        |
| A2  | 3.21 (m, 1H)                     | 73.3       | 100.6(A1)                       | 3.18 (m, 1H)                          | 73.2       | 100.5(A1)                       |
| A3  | 3.26 (m, 1H)                     | 76.7       | 69.7(A4), 73.3(A2)              | 3.24 (m, 1H)                          | 76.7       | 69.7(A4), 73.2(A2)              |
| A4  | 3.15 (m, 1H)                     | 69.7       | -                               | 3.16 (m, 1H)                          | 69.7       | -                               |
| A5  | 3.3 (m, 1H)                      | 77.0       | -                               | 3.26 (m, 1H)                          | 77         | -                               |
| A6a | 3.68 (m, 1H)                     | 60.7       | -                               | 3.68 (m, 1H)                          | 60.6       | -                               |
| A6b | 3.46 (m, 1H)                     | 60.7       | -                               | 3.48 (m, 1H)                          | 60.6       | -                               |

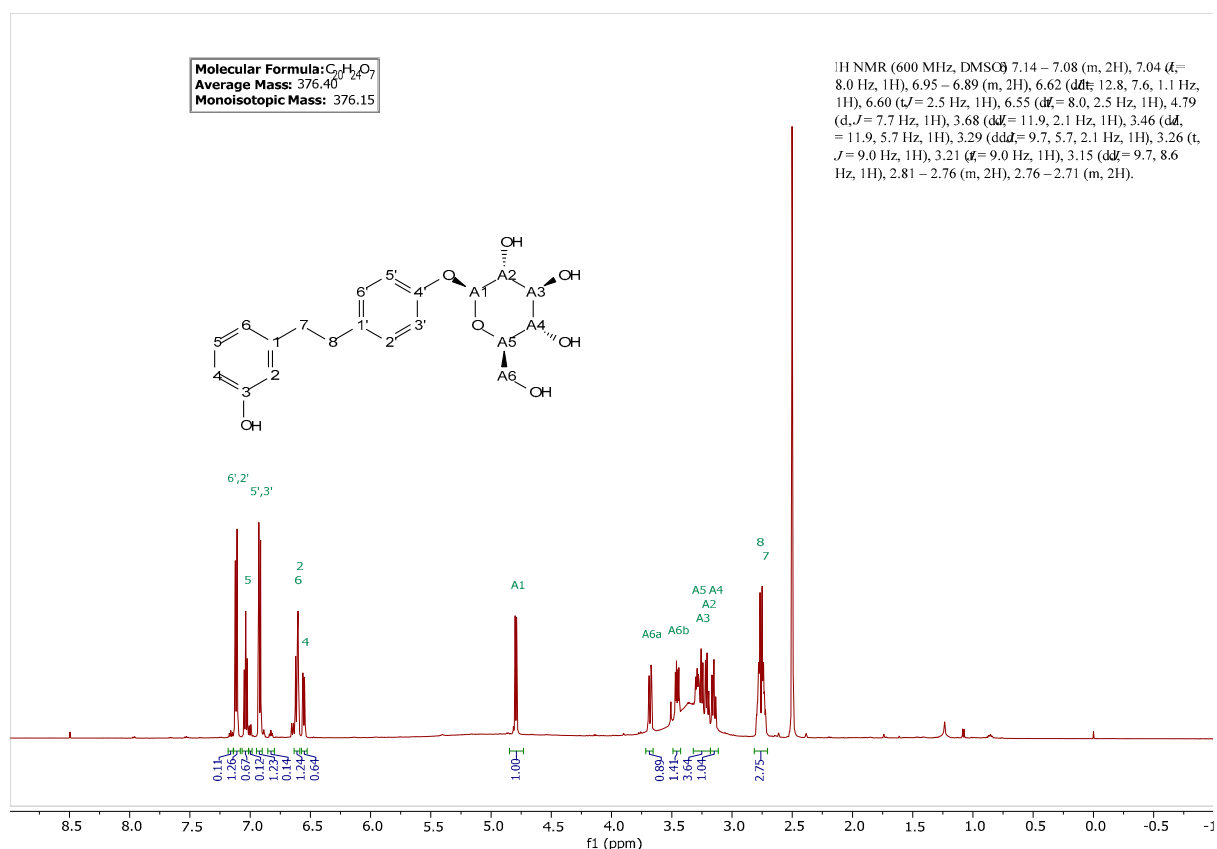

Figure C1: <sup>1</sup>H NMR spectrum (600 MHz, DMSO) of lunularin-4'-O-glucoside (16)

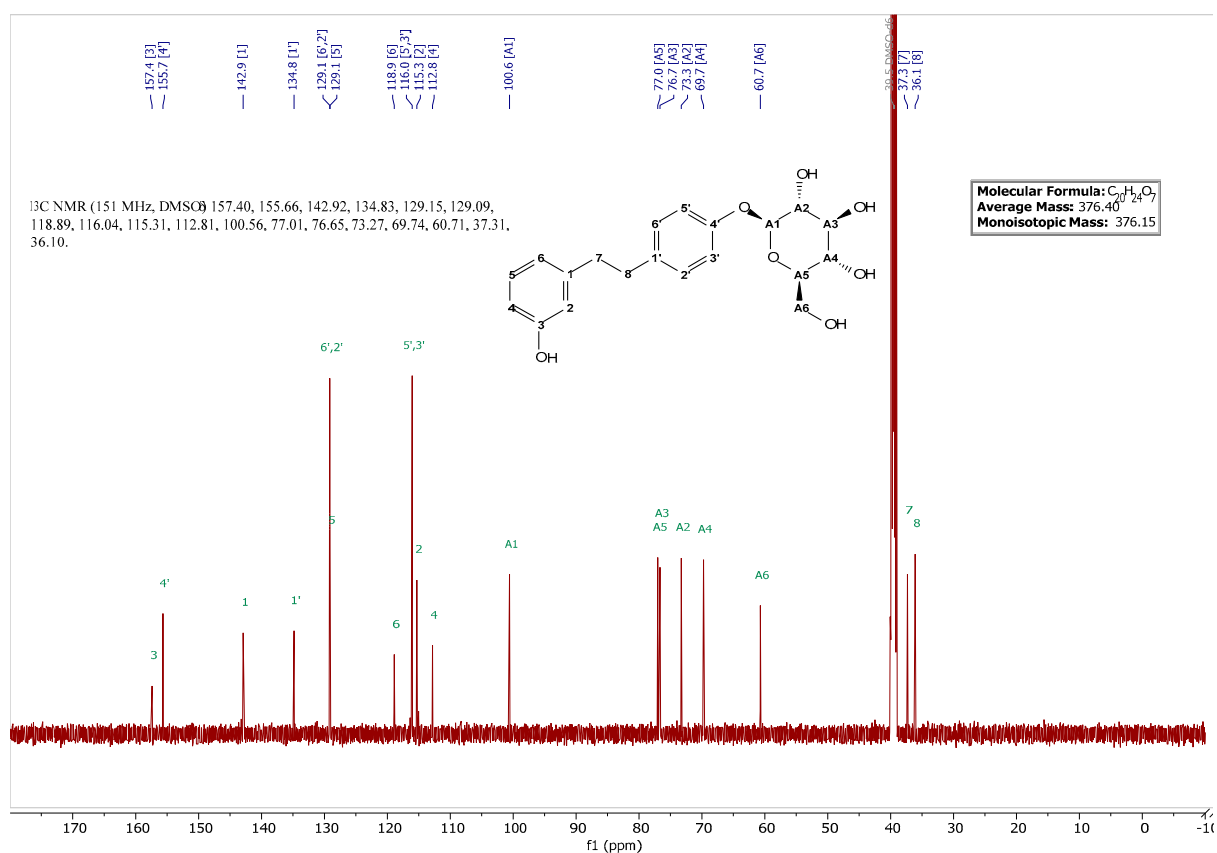

Figure C2: <sup>13</sup>C NMR spectrum (151 MHz, DMSO) of lunularin-4'-O-glucoside (16)

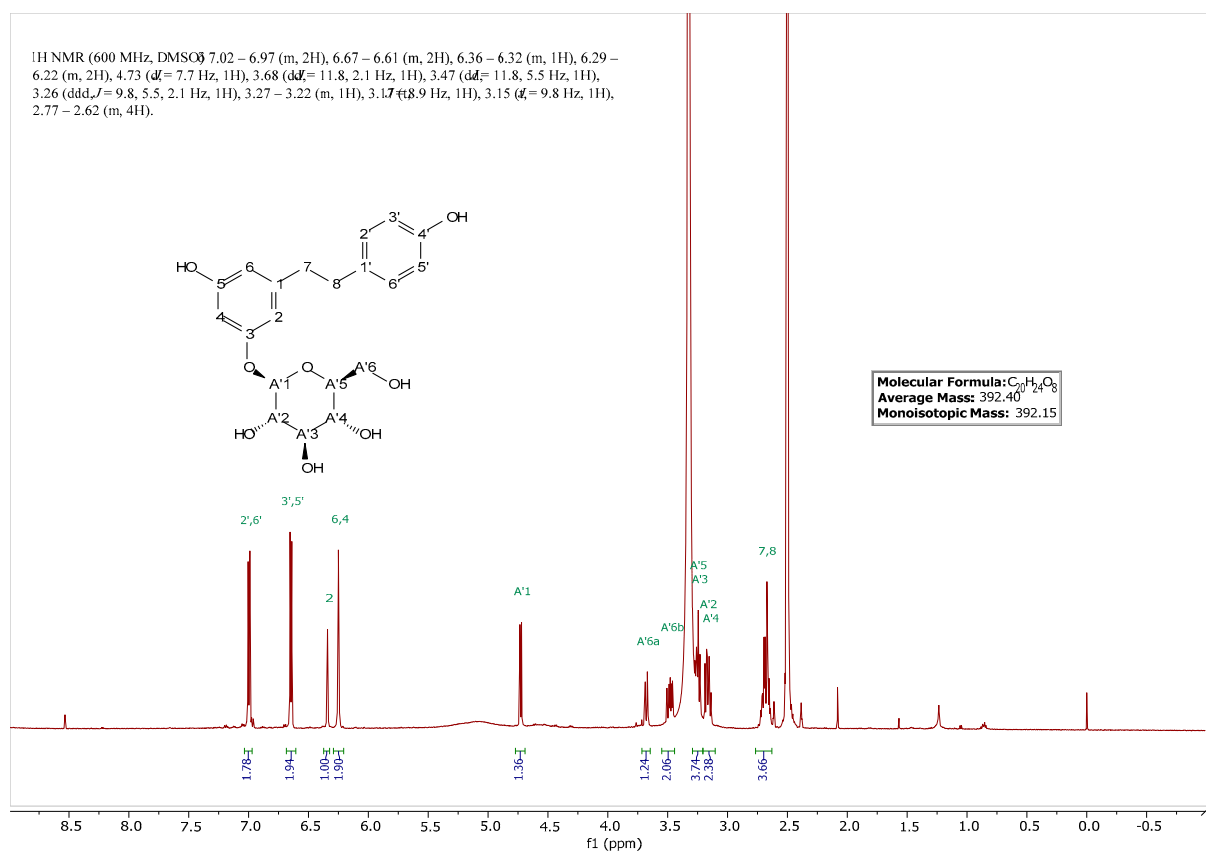

Figure C3: <sup>1</sup>H NMR spectrum (600 MHz, DMSO) of dihydroresveratrol-3-O-glucoside (17)

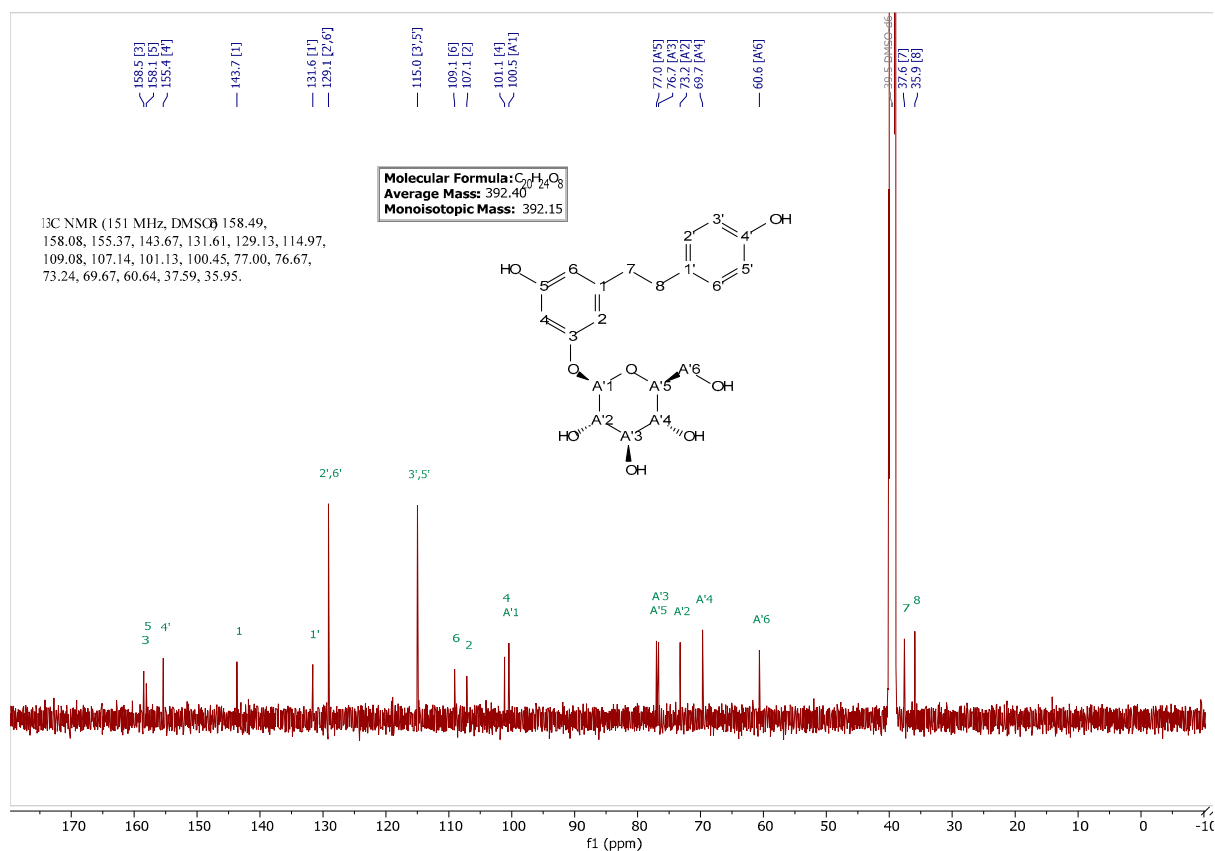

Figure C4: <sup>13</sup>C NMR spectrum (151 MHz, DMSO) of dihydroresveratrol-3-O-glucoside (17)

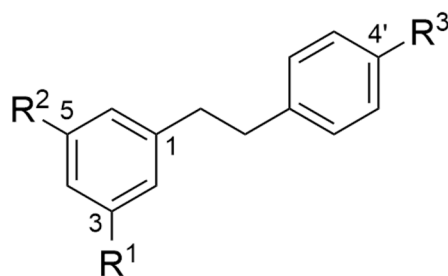

Lunularin 4'-O-glc (**16**) R1: OH, R2: H, R3: O- $\beta$ -Glc  
dihydroresveratrol 3-O-glc (**17**) R1: OH, R2: O- $\beta$ -Glc, R3: OH

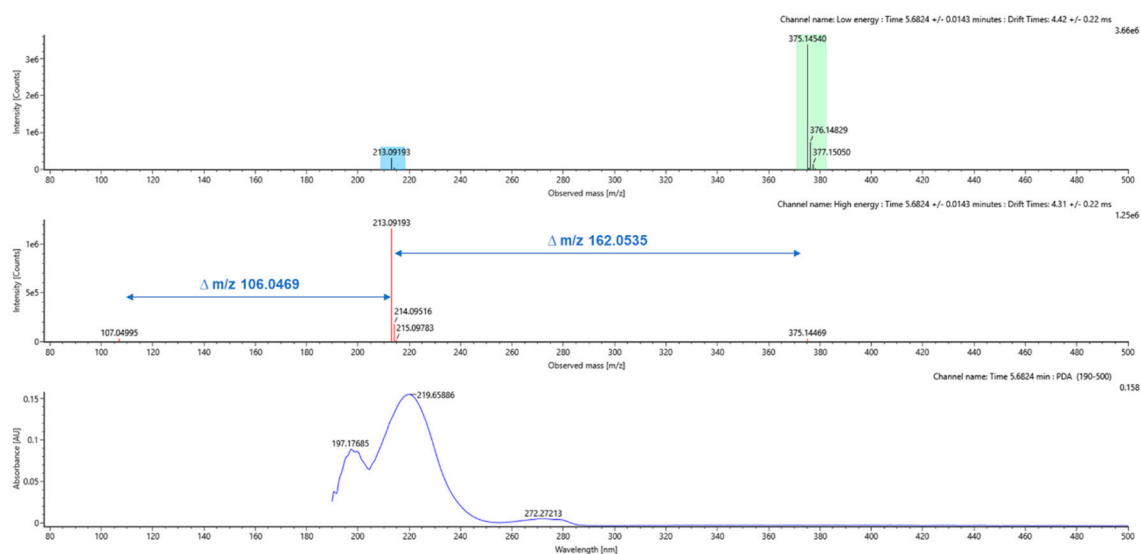

Figure C5: mass and UV-spectra of lunularin-4'-O-glucoside (**16**)

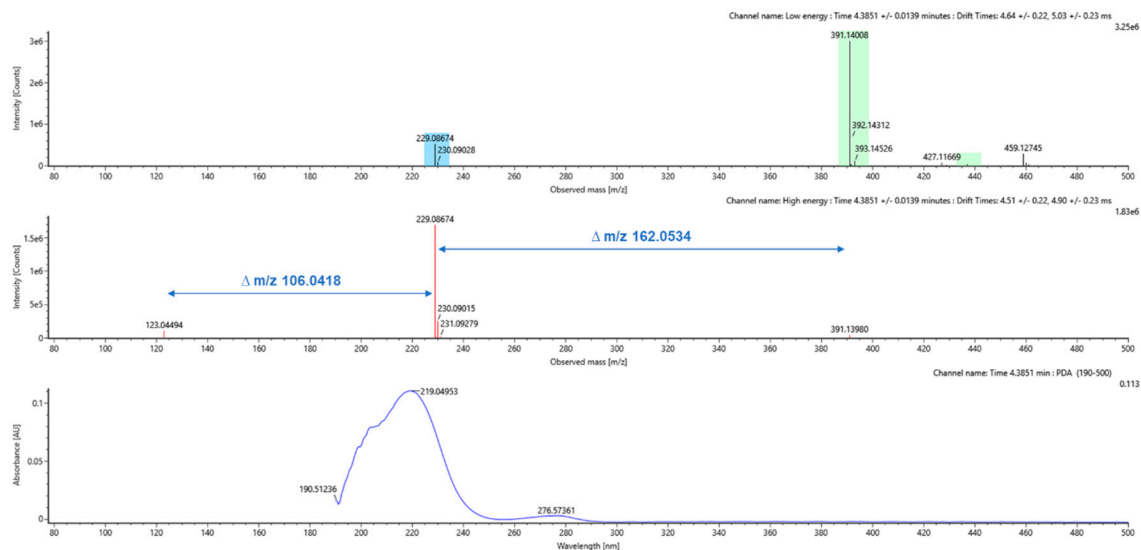

Figure C6: mass and UV spectra of dihydroresveratrol-3-O-glucoside (**17**)

Table C2: NMR assignments of 4-hydroxy-8-[4-glucopyranosyl]hydroxyphenyl]octane-2,6-dione (18)

| No  | $\delta_H$ (Multiplicity, J, nH) | $\delta_C$ | HMBC                                               |
|-----|----------------------------------|------------|----------------------------------------------------|
| 1   | 2.08 (s, 3H)                     | 30.5       | 50.7(3), 207.4(2)                                  |
| 2   | -                                | 207.4      | -                                                  |
| 3   | 2.47 (m, 2H)                     | 50.7       | 49.9(5), 63.5(4), 207.4(2)                         |
| 4   | 4.29 (tt, 7.7, 5.5 Hz, 1H)       | 63.5       | 49.9(5), 50.7(3), 207.4(2), 208.5(6)               |
| 5   | 2.47 (m, 2H)                     | 49.9       | 50.7(3), 63.5(4), 208.5(6)                         |
| 6   | -                                | 208.5      | -                                                  |
| 7   | 2.72 (m, 2H)                     | 44.4       | 134.4(1'), 208.5(6)                                |
| 8   | 2.72 (m, 2H)                     | 28         | 44.4(7), 129.0(2'), 129.0(6'), 134.4(1'), 208.5(6) |
| 1'  | -                                | 134.4      | -                                                  |
| 2'  | 7.12 (m, 1H)                     | 129        | 28.0(8), 155.7(4')                                 |
| 3'  | 6.94 (m, 1H)                     | 116.2      | 134.4(1'), 155.7(4')                               |
| 4'  | -                                | 155.7      | -                                                  |
| 5'  | 6.94 (m, 1H)                     | 116.2      | 135.4(1'), zz155.7(4')                             |
| 6'  | 7.12 (m, 1H)                     | 129        | 28.0(8), 155.7(4')                                 |
| A1  | 4.77 (d, 7.6 Hz, 1H)             | 100.6      | 155.7(4')                                          |
| A2  | 3.20 (m, 1H)                     | 73.3       | 76.6(A3), 100.6(A1)                                |
| A3  | 3.25 (m, 1H)                     | 76.6       | 69.8(A4), 73.3(A2)                                 |
| A4  | 3.14 (m, 1H)                     | 69.8       | 60.7(A6), 76.6(A3)                                 |
| A5  | 3.29 (m, 1H)                     | 77         | -                                                  |
| A6a | 3.66 (m, 1H)                     | 60.7       | 69.8(A4)                                           |
| A6b | 3.45 (m, 1H)                     | 60.7       | 77.0(A5)                                           |

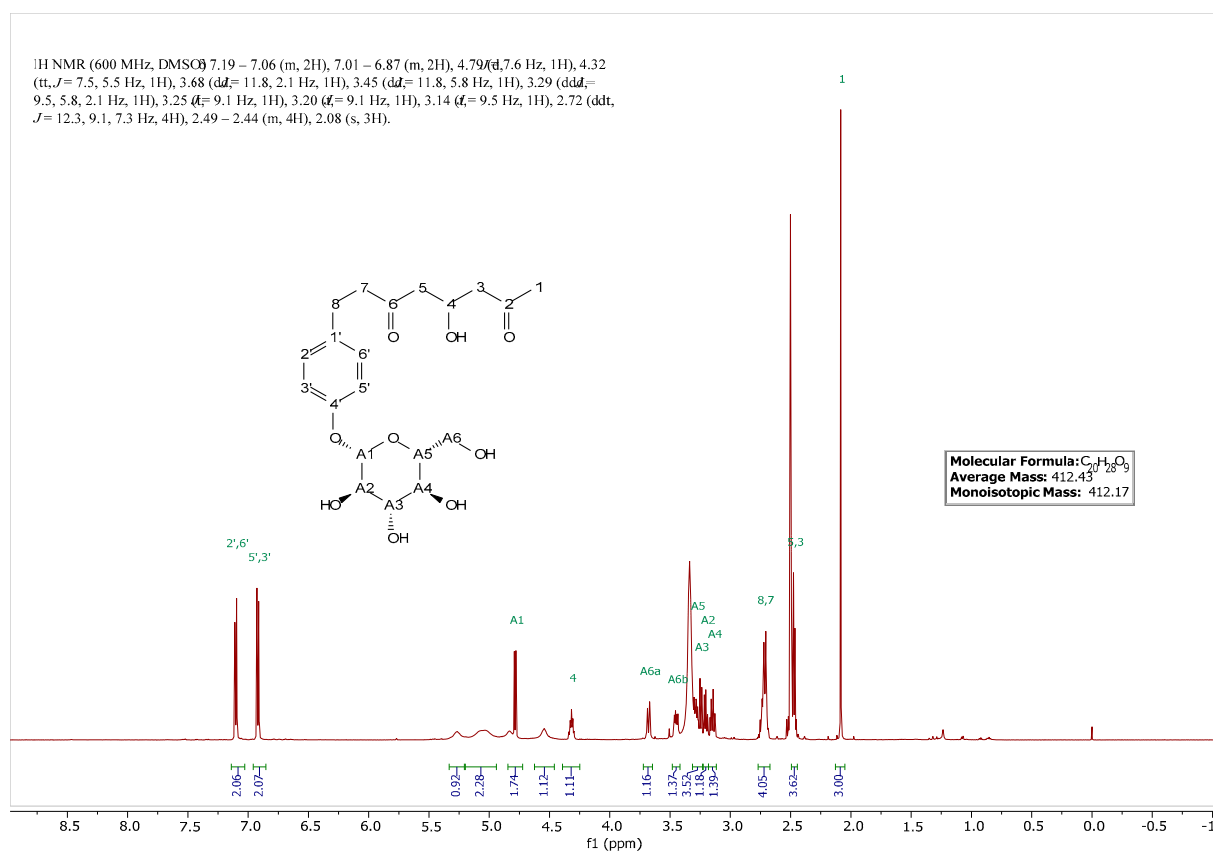

Figure C7: <sup>1</sup>H NMR spectrum (600 MHz, DMSO) of 4-hydroxy-8-[4-glucopyranosyl]hydroxyphenyl]octane-2,6-dione (18)

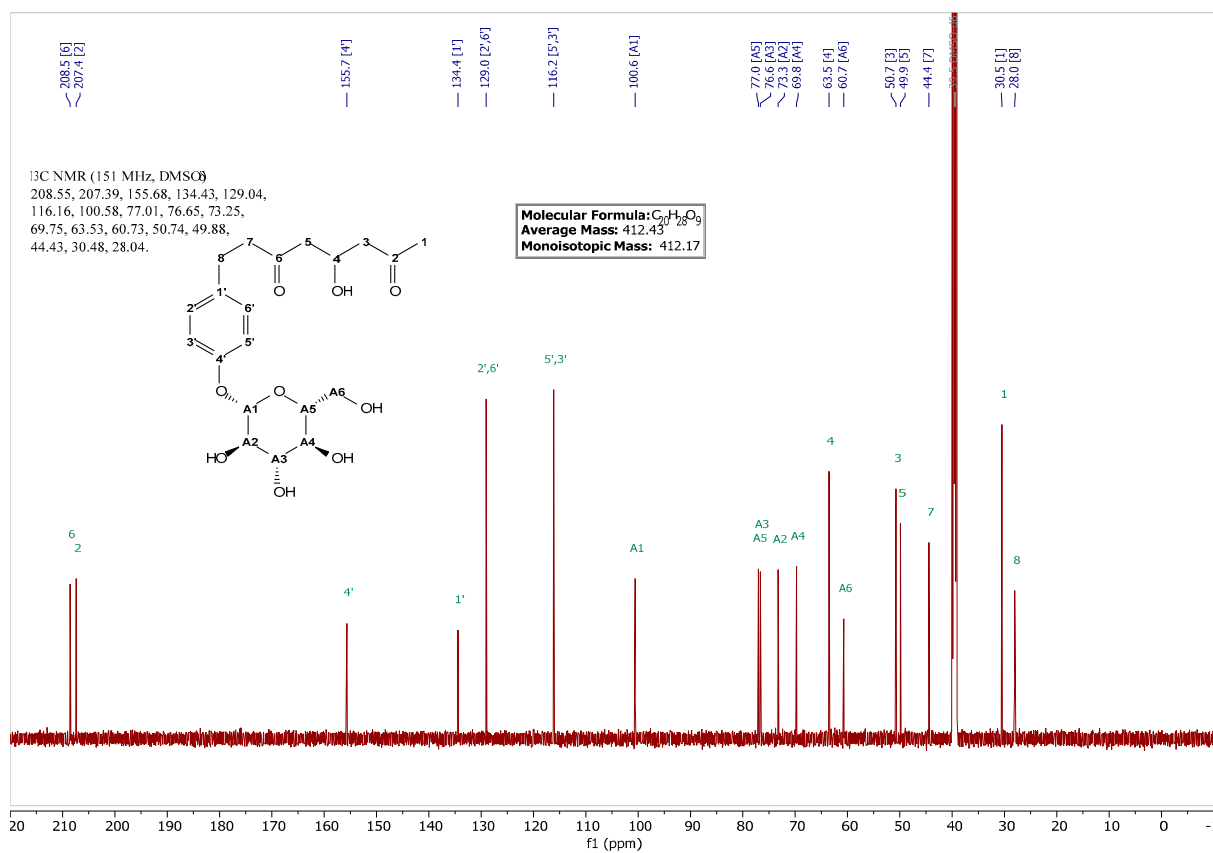

Figure C8: <sup>13</sup>C NMR spectrum (151 MHz, DMSO) of 4-hydroxy-8-[4-glucopyranosyl]hydroxyphenyl]octane-2,6-dione (18)

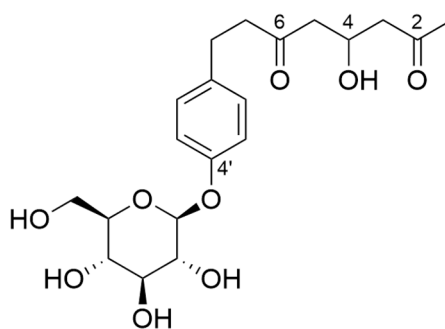

4-hydroxy-8-[4-glucopyranosyl]hydroxyphenyl]octane-2,6-dione (**18**)

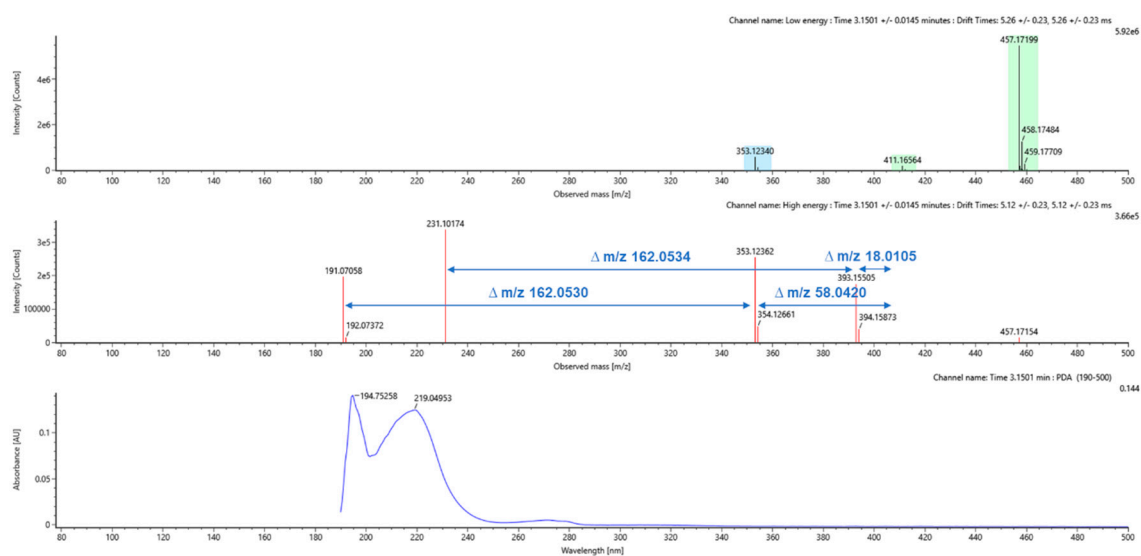

Figure C9: mass and UV-spectra of 4-hydroxy-8-[4-glucopyranosyl]hydroxyphenyl]octane-2,6-dione (**18**)
