# Supplementary material for: Separation of Dihydro-Isocoumarins and Dihydro-Stilbenoids from Hydrangea macrophylla ssp. serrata by Use of Counter-Current Chromatography
Source: MDPI journal article supplement (doi:10.3390/molecules27113424), 2022-05-26
Supplement: s1 [file s1]

# Supplemental File S7: Summarized compound list with further analytical data

Table G1: compound list with further analytical data

| nr. | Compound                                                     | group                 | RT (min) | Precursor ion ( <i>m/z</i> ) | Adduct | CCS (Å <sup>2</sup> ) | Characteristic mass fragments ( <i>m/z</i> )                                                                                                                                                                                                                                                       |
|-----|--------------------------------------------------------------|-----------------------|----------|------------------------------|--------|-----------------------|----------------------------------------------------------------------------------------------------------------------------------------------------------------------------------------------------------------------------------------------------------------------------------------------------|
| 1a  | hydrangenol 8-O-glucoside (isomer 1)                         | dihydroisocoumarin    | 4.37     | 417.1199                     | -H     | 199.54                | 255.0656 (C <sub>15</sub> H <sub>11</sub> O <sub>4</sub> <sup>-</sup> ), 211.0761 (C <sub>14</sub> H <sub>11</sub> O <sub>2</sub> <sup>-</sup> )                                                                                                                                                   |
| 1b  | hydrangenol 8-O-Glc (isomer 2)                               | dihydroisocoumarin    | 4.63     | 417.1194                     | -H     | 201.51                | 255.0656 (C <sub>15</sub> H <sub>11</sub> O <sub>4</sub> <sup>-</sup> ), 211.0761 (C <sub>14</sub> H <sub>11</sub> O <sub>2</sub> <sup>-</sup> )                                                                                                                                                   |
| 2a  | thunberginol G-3'-O-Glc (isomer 1)                           | dihydroisocoumarin    | 5.74     | 433.1139                     | -H     | 195.57                | 271.0606 (C <sub>15</sub> H <sub>11</sub> O <sub>5</sub> <sup>-</sup> ), 227.0709 (C <sub>14</sub> H <sub>11</sub> O <sub>3</sub> <sup>-</sup> )                                                                                                                                                   |
| 2b  | thunberginol G-3'-O-Glc (isomer 2)                           | dihydroisocoumarin    | 5.82     | 433.1145                     | -H     | 189.44                | 271.0606 (C <sub>15</sub> H <sub>11</sub> O <sub>5</sub> <sup>-</sup> ), 227.0709 (C <sub>14</sub> H <sub>11</sub> O <sub>3</sub> <sup>-</sup> )                                                                                                                                                   |
| 3a  | phyllodulcin-8-O-Glc (isomer 1)                              | dihydroisocoumarin    | 4.88     | 447.1296                     | -H     | 194.74                | 285.0767 (C <sub>16</sub> H <sub>13</sub> O <sub>5</sub> <sup>-</sup> ), 241.0869 (C <sub>15</sub> H <sub>13</sub> O <sub>3</sub> <sup>-</sup> ), 225.0556 (C <sub>14</sub> H <sub>9</sub> O <sub>3</sub> <sup>-</sup> )                                                                           |
| 3b  | phyllodulcin-8-O-Glc (isomer 2)                              | dihydroisocoumarin    | 5.13     | 447.1295                     | -H     | 194.83                | 285.0767 (C <sub>16</sub> H <sub>13</sub> O <sub>5</sub> <sup>-</sup> ), 241.0869 (C <sub>15</sub> H <sub>13</sub> O <sub>3</sub> <sup>-</sup> ), 225.0556 (C <sub>14</sub> H <sub>9</sub> O <sub>3</sub> <sup>-</sup> )                                                                           |
| 4   | hydrangenol-4'-O-Glc                                         | dihydroisocoumarin    | 5.97     | 417.1187                     | -H     | 216.86                | 255.0658 (C <sub>15</sub> H <sub>11</sub> O <sub>4</sub> <sup>-</sup> ), 211.0760 (C <sub>14</sub> H <sub>11</sub> O <sub>2</sub> <sup>-</sup> )                                                                                                                                                   |
| 5   | phyllodulcin-3'-O-Glc                                        | dihydroisocoumarin    | 6.23     | 447.1298                     | -H     | 191.87                | 285.0763 (C <sub>16</sub> H <sub>13</sub> O <sub>5</sub> <sup>-</sup> ), 241.0865 (C <sub>15</sub> H <sub>13</sub> O <sub>3</sub> <sup>-</sup> ), 225.0551 (C <sub>14</sub> H <sub>9</sub> O <sub>3</sub> <sup>-</sup> )                                                                           |
| 6   | thunberginol C-8-O-glucoside                                 | dihydroisocoumarin    | 4.04     | 433.1141                     | -H     | 190.26                | 271.0607 (C <sub>15</sub> H <sub>11</sub> O <sub>5</sub> <sup>-</sup> ), 227.0712 (C <sub>14</sub> H <sub>11</sub> O <sub>3</sub> <sup>-</sup> )                                                                                                                                                   |
| 7   | thunberginol E-6-O-glucoside                                 | dihydroisocoumarin    | 4.95     | 463.1256                     | -H     | 195.82                | 301.0718 (C <sub>16</sub> H <sub>13</sub> O <sub>6</sub> <sup>-</sup> ), 257.0817 (C <sub>15</sub> H <sub>13</sub> O <sub>4</sub> <sup>-</sup> ), 241.0504 (C <sub>14</sub> H <sub>9</sub> O <sub>4</sub> <sup>-</sup> )                                                                           |
| 8   | thunberginol D-6-glucoside                                   | dihydroisocoumarin    | 3.78     | 449.1091                     | -H     | 191.28                | 287.0555 (C <sub>15</sub> H <sub>11</sub> O <sub>6</sub> <sup>-</sup> ), 269.0447 (C <sub>15</sub> H <sub>9</sub> O <sub>5</sub> <sup>-</sup> ), 243.0656 (C <sub>14</sub> H <sub>11</sub> O <sub>3</sub> <sup>-</sup> )                                                                           |
| 9   | thunberginol C                                               | dihydroisocoumarin    | 6.3      | 271.0627                     | -H     | 163.02                | 227.0724 (C <sub>14</sub> H <sub>11</sub> O <sub>3</sub> <sup>-</sup> )                                                                                                                                                                                                                            |
| 10  | thunberginol E                                               | dihydroisocoumarin    | 6.69     | 301.0721                     | -H     | 173.81                | 283.0628 (C <sub>16</sub> H <sub>11</sub> O <sub>5</sub> <sup>-</sup> ), 257.0834 (C <sub>15</sub> H <sub>13</sub> O <sub>4</sub> <sup>-</sup> ), 241.0518 (C <sub>14</sub> H <sub>9</sub> O <sub>4</sub> <sup>-</sup> )                                                                           |
| 11  | thunberginol G                                               | dihydroisocoumarin    | 7.04     | 271.0610                     | -H     | 156.29                | 227.0711 (C <sub>14</sub> H <sub>11</sub> O <sub>3</sub> <sup>-</sup> )                                                                                                                                                                                                                            |
| 12  | hydrangenol                                                  | dihydroisocoumarin    | 8.15     | 255.0675                     | -H     | 160.24                | 211.0767 (C <sub>14</sub> H <sub>11</sub> O <sub>2</sub> <sup>-</sup> )                                                                                                                                                                                                                            |
| 13  | phyllodulcin                                                 | dihydroisocoumarin    | 8.39     | 285.0769                     | -H     | 171.41                | 225.0555 (C <sub>14</sub> H <sub>9</sub> O <sub>3</sub> <sup>-</sup> )                                                                                                                                                                                                                             |
| 14  | cudrabilbenzyl A                                             | dihydrostilbenic acid | 3.62     | 436.1337                     | -H     | 196.52                | 273.0765 (C <sub>15</sub> H <sub>13</sub> O <sub>5</sub> <sup>-</sup> ), 255.0658 (C <sub>15</sub> H <sub>11</sub> O <sub>4</sub> <sup>-</sup> ), 229.0868 (C <sub>14</sub> H <sub>13</sub> O <sub>3</sub> <sup>-</sup> ), 123.0451 (C <sub>7</sub> H <sub>7</sub> O <sub>2</sub> <sup>-</sup> )   |
| 15  | 2,4-Dihydroxy-6-[2-(-hydroxyphenyl)]benzoic acid             | dihydrostilbenic acid | 5.84     | 273.0785                     | -H     | 163.00                | 255.0675 (C <sub>15</sub> H <sub>11</sub> O <sub>4</sub> <sup>-</sup> ), 229.0801 (C <sub>14</sub> H <sub>13</sub> O <sub>3</sub> <sup>-</sup> ), 123.0457 (C <sub>7</sub> H <sub>7</sub> O <sub>2</sub> <sup>-</sup> )                                                                            |
| 16  | lunularin-4'-glucoside                                       | dihydrostilbene       | 5.68     | 375.1454                     | -H     | 180.32                | 213.0919 (C <sub>14</sub> H <sub>13</sub> O <sub>2</sub> <sup>-</sup> ), 107.0500 (C <sub>7</sub> H <sub>7</sub> O <sup>-</sup> )                                                                                                                                                                  |
| 17  | dihydroresveratrol-3-O-glucoside                             | dihydrostilbene       | 4.39     | 391.1401                     | -H     | 185.77                | 229.0867 (C <sub>14</sub> H <sub>13</sub> O <sub>3</sub> <sup>-</sup> ), 123.0449 (C <sub>7</sub> H <sub>7</sub> O <sub>2</sub> <sup>-</sup> )                                                                                                                                                     |
| 18  | 4-Hydroxy-8-(4-glucopyranosyl)hydroxyphenyl)octane-2,6-dione | triketide             | 3.15     | 411.1656                     | -H     | 199.00                | 393.1551 (C <sub>20</sub> H <sub>25</sub> O <sub>8</sub> <sup>-</sup> ), 353.1236 (C <sub>17</sub> H <sub>21</sub> O <sub>8</sub> <sup>-</sup> ), 231.1017 (C <sub>14</sub> H <sub>15</sub> O <sub>3</sub> <sup>-</sup> ), 191.0706 (C <sub>11</sub> H <sub>11</sub> O <sub>3</sub> <sup>-</sup> ) |
| 19  | taxiphyllin                                                  | cyanogenic glycoside  | 2.05     | 310.0924                     | -H     | 240.37                | 179.0557 (C <sub>6</sub> H <sub>11</sub> O <sub>6</sub> <sup>-</sup> )                                                                                                                                                                                                                             |
| 20  | deoxyloganic acid                                            | secoiridoid           | 4.04     | 359.1345                     | -H     | 183.24                | 197.0814 (C <sub>10</sub> H <sub>13</sub> O <sub>4</sub> <sup>-</sup> ), 153.0916 (C <sub>9</sub> H <sub>13</sub> O <sub>2</sub> <sup>-</sup> ), 135.0812 (C <sub>9</sub> H <sub>12</sub> O <sup>-</sup> )                                                                                         |

|    |                                          |             |      |          |    |        |                                                                                                                                                                                                                              |
|----|------------------------------------------|-------------|------|----------|----|--------|------------------------------------------------------------------------------------------------------------------------------------------------------------------------------------------------------------------------------|
| 21 | loganic acid                             | secoiridoid | 2.59 | 375.1297 | -H | 186.21 | 195.0653 (C <sub>10</sub> H <sub>11</sub> O <sub>4</sub> <sup>-</sup> ), 151.0759 (C <sub>9</sub> H <sub>11</sub> O <sub>2</sub> <sup>-</sup> )                                                                              |
| 22 | hydramacroside B                         | secoiridoid | 5.59 | 605.2258 | -H | 236.88 | 587.2147 (C <sub>30</sub> H <sub>35</sub> O <sub>12</sub> <sup>-</sup> ), 441.1409 (C <sub>20</sub> H <sub>25</sub> O <sub>11</sub> <sup>-</sup> ), 413.1458 (C <sub>19</sub> H <sub>25</sub> O <sub>10</sub> <sup>-</sup> ) |
| 23 | hydrangenoside A                         | secoiridoid | 6.33 | 619.2397 | -H | 239.42 | 601.2286 (C <sub>31</sub> H <sub>37</sub> O <sub>12</sub> <sup>-</sup> ), 231.1018 (C <sub>14</sub> H <sub>15</sub> O <sub>3</sub> <sup>-</sup> ), 189.0914 (C <sub>12</sub> H <sub>13</sub> O <sub>2</sub> <sup>-</sup> )   |
| 24 | quercetin-3-O-rhamnopyransyl sophoroside | flavonol    | 3.63 | 771.2013 | -H | 258.12 | 300.0268 (C <sub>15</sub> H <sub>8</sub> O <sub>7</sub> <sup>-</sup> )                                                                                                                                                       |
| 25 | quercetin-3-O-sophoroside                | flavonol    | 3.76 | 625.1424 | -H | 231.49 | 300.0274 (C <sub>15</sub> H <sub>8</sub> O <sub>7</sub> <sup>-</sup> )                                                                                                                                                       |
| 26 | kaempferol-3-O-sophoroside               | flavonol    | 4.15 | 609.1466 | -H | 231.03 | 284.0317 (C <sub>15</sub> H <sub>8</sub> O <sub>6</sub> <sup>-</sup> )                                                                                                                                                       |
