# Supplementary material for: Separation of Dihydro-Isocoumarins and Dihydro-Stilbenoids from Hydrangea macrophylla ssp. serrata by Use of Counter-Current Chromatography
Source: MDPI journal article supplement (doi:10.3390/molecules27113424), 2022-05-26
Supplement: s1 [file s1]

**Supplemental File S1: NMR and mass spectrometry of dihydroisocoumarins**

*Table A1: NMR assignments of hydrangenol 8-O-glc (1), thunberginol G-3'-glc (2) and phyllodulcin 8-O-glc (3)*

| hydrangenol 8-O-glc (1) |                                  |             |                                                 | thunberginol G-3'-glc (2)        |              |                                                                 | phyllodulcin 8-O-glc (3)         |            |                                            |
|-------------------------|----------------------------------|-------------|-------------------------------------------------|----------------------------------|--------------|-----------------------------------------------------------------|----------------------------------|------------|--------------------------------------------|
| No                      | $\delta_H$ (Multiplicity, J, nH) | $\delta_C$  | HMBC                                            | $\delta_H$ (Multiplicity, J, nH) | $\delta_C$   | HMBC                                                            | $\delta_H$ (Multiplicity, J, nH) | $\delta_C$ | HMBC                                       |
| 1                       | -                                | 162.8/161.2 | -                                               | -                                | 169.1/ 169.2 | -                                                               | -                                | 162.7      | -                                          |
| 3                       | 5.48/5.40 (dd, 11.6,2.6 Hz, 1H)  | 79.0/78.4   | 141.7/142.0(10), 128.2(6',2')                   | 5.62/5.64 (dd, 12.4,3.2 Hz, 1H)  | 80.2/ 80.4   | 121.5/121.7(6'), 129.0/129.0(1'), 140.5/140.5(10)               | 5.45 (dd, 12.3,3.2 Hz, 1H)       | 78.8       | 113.9(2'), 117.5(6'), 130.8(1'), 141.9(10) |
| 4a                      | 3.35/3.35 (m, 1H)                | 34.7/34.8   | -                                               | 3.42/ 3.42 (m, 1H)               | 33.2/ 33.2   | 80.2/80.4(3), 140.5/140.5(10)                                   | 3.3 (m, 1H)                      | 34.9       | -                                          |
| 4b                      | 3.09/3.08 (dd, 16.4,2.6 Hz, 1H)  | 34.7/34.8   | 114.1/114.4(9), 120.4/121.6(5), 141.7/142.0(10) | 3.16/ 3.16 (m, 1H)               | 33.2/ 33.2   | 108.3/108.4(9), 118.3/118.3(5), 140.5/140.5(10)                 | 3.11 (dd, 16.7,2.6 Hz, 1H)       | 34.9       | 114.4(9),121.6(5), 141.9(10)               |
| 5                       | 7.11/7.02 (d, 7.5 Hz, 1H)        | 121.7/120.5 | 34.7/34.8(4), 114.1/114.4(9), 116.5(7)          | 6.87/ 6.87 (m, 1H)               | 118.3/ 118.3 | 33.2/33.2(4), 108.3/108.4(9)                                    | 7.11 (d, 7.6 Hz, 1H)             | 121.6      | 34.9(4), 114.4(9),116.5(7)                 |
| 6                       | 7.60/7.53 (dd, 8.5,7.5 Hz, 1H)   | 134.9/134.3 | 141.7/142.0(10), 158.2/158.8(8)                 | 7.53/ 7.53 (dd, 8.4,7.4 Hz, 1H)  | 136.2/ 136.2 | 140.5/140.5(10), 160.8/160.8(8)                                 | 7.60 (dd, 8.5,7.6 Hz, 1H)        | 134.9      | 141.9(10), 158.8(8)                        |
| 7                       | 7.33/7.19 (d, 8.5 Hz, 1H)        | 116.5/114.4 | 120.5/121.7(5)                                  | 6.90/ 6.90 (d, 8.4 Hz, 1H)       | 115.3/ 115.3 | 118.3/118.3(5), 160.8/160.8(8)                                  | 7.33 (d, 8.5 Hz, 1H)             | 116.5      | 114.4(9),121.6(5), 158.8(8)                |
| 8                       | -                                | 158.8/158.2 | -                                               | -                                | 160.8/ 160.8 | -                                                               | -                                | 158.8      | -                                          |
| 9                       | -                                | 114.4/114.1 | -                                               | -                                | 108.3/ 108.4 | -                                                               | -                                | 114.4      | -                                          |
| 10                      | -                                | 142.0/141.7 | -                                               | -                                | 140.5/ 140.5 | -                                                               | -                                | 141.9      | -                                          |
| 11                      | -                                | -           | -                                               | -                                | -            | -                                                               | 3.78 (s, 3H)                     | 55.6       | 147.8(4')                                  |
| 1'                      | -                                | 128.6/128.8 | -                                               | -                                | 129.0/ 129.0 | -                                                               | -                                | 130.8      | -                                          |
| 2'                      | 7.33/7.31 (m, 1H)                | 128.2/128.0 | 78.4/79.0(3), 157.5/157.6(4')                   | 7.29/ 7.29 (m/ 1H)               | 115.2/ 115.3 | 80.2/80.4(3), 121.5/121.7(6'), 145.0/145.1(3'), 147.1/147.2(4') | 6.94 (d, 2.1 Hz, 1H)             | 113.9      | 117.5(6')                                  |
| 3'                      | 6.81/6.78 (m, 1H)                | 115.0/115.0 | 128.6/128.8(1'), 157.5/157.6(4')                | -                                | 145.0/ 145.1 | -                                                               | -                                | 146.3      | -                                          |
| 4'                      | -                                | 157.6/157.5 | -                                               | -                                | 147.1/ 147.2 | -                                                               | -                                | 147.8      | -                                          |
| 5'                      | 6.81/6.78 (m, 1H)                | 115.0/115.0 | 128.6/128.8(1'), 157.5/157.6(4')                | 6.86/ 6.86 (m, 1H)               | 115.6/ 115.7 | 129.0/129.0(1'), 145.0/145.1(3')                                | 6.95 (d, 8.1 Hz, 1H)             | 111.8      | 130.8(1'), 146.3(3')                       |
| 6'                      | 7.33/7.31 (m, 1H)                | 128.2/128.0 | 78.4/79.0(3), 157.5/157.6(4')                   | 7.04/ 7.05 (m, 1H)               | 121.5/ 121.7 | 80.2/80.4(3), 147.1/147.2(4')                                   | 6.90 (dd, 8.1,2.1 Hz, 1H)        | 117.5      | 78.8(3), 113.9(2'),147.8(4')               |
| A1                      | 4.86/4.95 (d, 7.6 Hz, 1H)        | 103.3/100.3 | 158.2/158.8(8)                                  | 4.70/ 4.71 (d, 7.5 Hz, 1H)       | 101.9/ 102.3 | 145.0/145.1(3')                                                 | 4.86 (d, 7.2 Hz, 1H)             | 103.2      | 158.8(8)                                   |
| A2                      | 3.35/3.35 (m, 1H)                | 73.1/73.5   | -                                               | 3.3/ 3.3 (m, 1H)                 | 73.2/ 73.2   | -                                                               | 3.3 (m, 1H)                      | 73.5       | -                                          |
| A3                      | 3.35/3.27 (m, 1H)                | 75.6/76.5   | -                                               | 3.3/ 3.3 (m, 1H)                 | 75.9/ 75.9   | -                                                               | 3.3 (m, 1H)                      | 75.6       | -                                          |
| A4                      | 3.19/3.19 (m, 1H)                | 69.6/69.4   | 75.6/76.5(3)                                    | 3.16/ 3.16 (m/ 1H)               | 69.7/ 69.8   | -                                                               | 3.18 (m, 1H)                     | 69.6       | -                                          |
| A5                      | 3.35/3.35 (m, 1H)                | 77.5/77.0   | -                                               | 3.3/ 3.3 (m, 1H)                 | 77.0/ 77.2   | -                                                               | 3.39 (m, 1H)                     | 77.5       | 60.7(A6), 103.2(A1)                        |
| A6a                     | 3.75/3.71 (m, 1H)                | 60.7/60.6   | 69.4/69.6(A4)                                   | 3.71 (m, 1H)                     | 60.5/ 60.6   | -                                                               | 3.74 (m, 1H)                     | 60.7       | -                                          |
| A6b                     | 3.49/3.49 (m, 1H)                | 60.7/60.6   | -                                               | 3.48 (m, 1H)                     | 60.5/ 60.6   | -                                                               | 3.51 (m, 1H)                     | 60.7       | 77.5(A5)                                   |

\* Compounds were obtained as position 3 diastereomers. Signals could not be unequivocally assigned.

Table A2: NMR assignments of hydrangenol-4'-O-glc (4) and phyllodulcin 3'-O-glc (5)

| No  | hydrangenol-4'-O-glc (4)                      |                         |                         | phyllodulcin 3'-O-glc (5)                     |                         |                                                   |
|-----|-----------------------------------------------|-------------------------|-------------------------|-----------------------------------------------|-------------------------|---------------------------------------------------|
|     | $\delta_H$ (Multiplicity, J, nH) <sup>*</sup> | $\delta_C$ <sup>*</sup> | HMBC                    | $\delta_H$ (Multiplicity, J, nH) <sup>*</sup> | $\delta_C$ <sup>*</sup> | HMBC                                              |
| 1   | -                                             | 169.0/169.0             | -                       | -                                             | 169.1/169.1             | -                                                 |
| 3   | 5.71/ 5.71 (dd, 12.1,3.2 Hz, 1H)              | 79.8/ 79.9              | 128.0(2'), 128.0(6')    | 5.66/5.67 (dd, 11.8,3.2 Hz, 1H)               | 80.0/80.0               | -                                                 |
| 4a  | 3.38/ 3.38 (m, 1H)                            | 33.8/ 33.8              | 140.5(10)               | 3.41/3.41 (m, 1H)                             | 33.6/33.5               | 80.0(3), 108.5(9), 117.9(5), 130.6(1'), 140.5(10) |
| 4b  | 3.15/ 3.15 (m, 1H)                            | 33.8/ 33.8              | 108.6(9),140.5(10)      | 3.15/3.15 (m, 1H)                             | 33.6/33.5               | 108.5(9), 117.9(5), 140.5(10)                     |
| 5   | 6.80/ 6.80 (d, 7.4 Hz, 1H)                    | 117.6/ 117.6            | 33.8(4), 108.6(9)       | 6.83/6.83 (m, 1H)                             | 117.9/117.9             | 33.5/33.6(4), 108.5(9), 115.8(7)                  |
| 6   | 7.49/ 7.49 (dd, 8.4,7.3 Hz, 1H)               | 136.2/ 136.2            | 140.5(10), 161.9(8)     | 7.51/7.51 (6.8,7.3 Hz, 1H)                    | 136.3/136.3             | 140.5(10), 161.5(8)                               |
| 7   | 6.86/ 6.86 (d, 8.4 Hz, 1H)                    | 116.2/ 116.2            | 108.6(9),117.6(5)       | 6.87/6.87 (d, 8.3 Hz, 1H)                     | 115.8/115.8             | 108.5(9),117.9(5)                                 |
| 8   | -                                             | 161.9/ 161.9            | -                       | -                                             | 161.5/161.5             | -                                                 |
| 9   | -                                             | 108.6/ 108.6            | -                       | -                                             | 108.5/108.5             | -                                                 |
| 10  | -                                             | 140.5/ 140.5            | -                       | -                                             | 140.5/140.5             | -                                                 |
| 11  | -                                             | 131.7/ 131.7            | -                       | 3.8/3.78 (s, 3H)                              | 55.7/55.7               | 149.2(4')                                         |
| 1'  | 7.45/ 7.45 (m, 1H)                            | 128.0/ 128.0            | -                       | -                                             | 130.6/130.6             | -                                                 |
| 2'  | 7.08/ 7.08 (m, 1H)                            | 116.2/ 116.2            | 79.8/79.9(3), 157.6(4') | 7.23/7.23 (m, 1H)                             | 114.2/114.2             | 80.0(3),120.2/120.6(6'), 146.3(3'), 149.2(4')     |
| 3'  | -                                             | 157.6/ 157.6            | 131.7(1'),157.6(4')     | -                                             | 146.3/146.3             | -                                                 |
| 4'  | 7.08 (m, 1H)                                  | 116.2, 116.2            | -                       | -                                             | 149.2/149.2             | -                                                 |
| 5'  | 7.45                                          | 128.0, 128.0            | 131.7(1'),157.6(4')     | 7.03/7.03 (d, 8.4 Hz, 1H)                     | 112.2/112.3             | 130.6(1'),146.3(3')                               |
| 6'  | 4.90/ 4.90 (d, 7.5 Hz, 1H)                    | 100.2/ 100.2            | 79.8/79.9(3), 157.6(4') | 7.09/7.09 (m, 1H)                             | 120.6/120.2             | 80.0(3), 114.2(2'),149.2(4')                      |
| A1  | 3.24/ 3.24 (m, 1H)                            | 73.2/ 73.2              | 157.6(4')               | 4.92/4.92 (d, 7.8 Hz, 1H)                     | 100.1/100.1             | 146.3(3')                                         |
| A2  | 3.28/ 3.28 (m, 1H)                            | 76.6/ 76.6              | 76.6(A3), 100.2(A1)     | 3.31/3.31 (m, 1H)                             | 73.2/73.2               | -                                                 |
| A3  | 3.15/ 3.15 (m, 1H)                            | 69.7/ 69.7              | 69.7(A4), 73.2(A2)      | 3.31/3.31 (m, 1H)                             | 77.0/77.0               | -                                                 |
| A4  | 3.33/ 3.33 (m, 1H)                            | 77.1/ 77.1              | -                       | 3.15/3.15 (m, 1H)                             | 69.6/69.6               | -                                                 |
| A5  | 3.69/ 3.69 (m, 1H)                            | 60.7/ 60.7              | -                       | 3.31/3.31 (m, 1H)                             | 77.1/77.1               | -                                                 |
| A6a | 3.46/ 3.46 (m, 1H)                            | 60.7/ 60.7              | -                       | 3.67/3.67 (m, 1H)                             | 60.5/60.5               | 69.6(A4)                                          |
| A6b | -                                             | 169.0/169.0             | 77.1(A5)                | 3.46/3.46 (m, 1H)                             | 60.5/60.5               |                                                   |

\* Compounds were obtained as position 3 diastereomers. Signals could not be unequivocally assigned.

Table A3: NMR assignments of thunberginol C-8-O-glc (6), thunberginol E-6-O-glc (7) and thunberginol D-6-O-glc (8)

| No  | thunberginol C-8-O-glc (6)       |             |                                                                | thunberginol E-6-O-glc (7)       |            |                                            | thunberginol D-6-O-glc (8)       |              |                                                  |
|-----|----------------------------------|-------------|----------------------------------------------------------------|----------------------------------|------------|--------------------------------------------|----------------------------------|--------------|--------------------------------------------------|
|     | $\delta_H$ (Multiplicity, J, nH) | $\delta_C$  | HMBC                                                           | $\delta_H$ (Multiplicity, J, nH) | $\delta_C$ | HMBC                                       | $\delta_H$ (Multiplicity, J, nH) | $\delta_C$   | HMBC                                             |
| 1   | -                                | 161.6/161.6 | -                                                              | -                                | 169.2      | -                                          | -                                | 169.1/169.2  | -                                                |
| 3   | 5.38/5.33 (dd, 11.2, 2.9 Hz, 1H) | 78.6/77.8   | -                                                              | 5.60 (dd, 11.4, 3.3 Hz, 1H)      | 79.7       | 113.9(2'), 117.6(6'), 130.8(1'), 142.1(10) | 5.53/5.55 (dd, 11.9, 3.3 Hz, 1H) | 79.9/79.9    | 114.1(2'), 117.7(6'), 128.9/129.0(1'), 142.0(10) |
| 4a  | 3.21/3.21 (m, 1H)                | 35.2/35.1   | -                                                              | 3.29 (m, 1H)                     | 33.8       | -                                          | 3.34/ 3.34 (m, 1H)               | 33.7/33.7    | -                                                |
| 4b  | 2.99/3.00 (m, 1H)                | 35.2/35.1   | 105.8/105.9(9), 107.9/108.9(5) 143.5/143.9(10)                 | 3.12 (dd, 16.8, 3.3 Hz, 1H)      | 33.8       | 102.6(9), 107.3(5), 142.1(10)              | 3.09/ 3.09 (m, 1H)               | 33.7/33.7    | 102.5(9), 107.2/107.3(5), 142.0(10)              |
| 5   | 6.49/6.41 (m, 1H)                | 108.9/107.9 | 35.1/35.2(4), 102.3(7), 105.8/105.9(9)                         | 6.55 (d, 2.3 Hz, 1H)             | 107.3      | 33.8(4), 102.6(9)                          | 6.55/6.55 (m, 1H)                | 107.2/ 107.3 | 33.7(4), 102.5/ 102.5(9)                         |
| 6   | -                                | 163.3/162.8 | -                                                              | -                                | 163.3      | -                                          | -                                | 162.9/162.9  | -                                                |
| 7   | 6.72/6.57 (m, 1H)                | 104.1/102.3 | 105.8/105.8(9), 107.9/108.9(5), 160.7/161.5(8), 162.8/163.3(6) | 6.51 (d, 2.3 Hz, 1H)             | 101.8      | 102.6(9), 107.3(5), 163.3(8)               | 6.51/ 6.53 (m, 1H)               | 101.6/101.6  | 102.5/ 102.5(9), 107.2/ 107.3(5)                 |
| 8   | -                                | 161.5/160.7 | -                                                              | -                                | 163.0      | -                                          | -                                | 163.2/163.2  | -                                                |
| 9   | -                                | 105.9/105.8 | -                                                              | -                                | 102.6      | -                                          | -                                | 102.5/ 102.5 | -                                                |
| 10  | -                                | 143.9/143.5 | -                                                              | -                                | 142.1      | -                                          | -                                | 142.0/142.0  | -                                                |
| 11  | -                                | -           | -                                                              | 3.79 (s, 3H)                     | 55.7       | 147.9(4')                                  | -                                | -            | -                                                |
| 1'  | -                                | 128.9/129.2 | -                                                              | -                                | 130.8      | -                                          | -                                | 128.9/ 129.0 | -                                                |
| 2'  | 7.31/7.27 (m, 1H)                | 128.2/128.0 | 77.8/78.6(3), 157.5(157.6(4'))                                 | 6.92 (d, 2.1 Hz, 1H)             | 113.9      | 79.7(3), 117.6(6'), 147.9(4')              | 6.88/6.88 (m, 1H)                | 114.1/114.1  | 79.9(3), 117.7(6'), 145.6(4')                    |
| 3'  | 6.80/6.77 (m, 1H)                | 115.1/115.1 | 128.9/129.2(1'), 157.5/157.6(4')                               | -                                | 146.5      | -                                          | -                                | 145.1/145.1  | 79.9(3), 117.7(6'), 145.6(4')                    |
| 4'  | -                                | 157.6/157.5 | -                                                              | -                                | 147.9      | -                                          | -                                | 145.6/145.6  | -                                                |
| 5'  | 6.80/6.77 (m, 1H)                | 115.1/115.1 | 128.9/129.2(1'), 157.5/157.6(4')                               | 6.95 (d, 8.4 Hz, 1H)             | 112        | 130.8(1'), 146.5(3')                       | 6.75/6.75 (m, 1H)                | 115.3/115.3  | -                                                |
| 6'  | 7.31/7.27 (m, 1H)                | 128.2/128.0 | 77.8/78.6(3), 157.5(157.6(4'))                                 | 6.88 (dd, 8.4, 2.1 Hz, 1H)       | 117.6      | 79.7(3), 113.9(2'), 147.9(4')              | 6.75/6.75 (m, 1H)                | 117.7/117.7  | -                                                |
| A1  | 4.74/4.82 (d, 7.4 Hz, 1H)        | 103.9/101.0 | 160.7/161.5(8)                                                 | 4.98 (d, 7.5 Hz, 1H)             | 99.8       | 163.3(6)                                   | 4.97/4.99 (d, 7.8 Hz, 1H)        | 99.6/ 99.5   | 163.2 (6)                                        |
| A2  | 3.34/3.34 (m, 1H)                | 73.7/73.2   | -                                                              | 3.23 (m, 1H)                     | 73.1       | 99.8(A1)                                   | 3.23/3.23 (m, 1H)                | 73.0/73.0    | 76.4(A3), 99.5/99.6(A1)                          |
| A3  | 3.34/3.34 (m, 1H)                | 75.5/76.5   | -                                                              | 3.29 (m, 1H)                     | 76.5       | -                                          | 3.34/3.34 (m, 1H)                | 76.4/76.4    | -                                                |
| A4  | 3.21/3.21 (m, 1H)                | 69.6/69.4   | -                                                              | 3.17 (m, 1H)                     | 69.5       | -                                          | 3.17/3.17 (m, 1H)                | 69.4/69.4    | 60.4(A6), 76.4(A3)                               |
| A5  | 3.34/3.34 (m, 1H)                | 77.6/76.5   | -                                                              | 3.39 (m, 1H)                     | 77.2       | -                                          | 3.34/3.34 (m, 1H)                | 77.0/ 77.0   | -                                                |
| A6a | 3.75/3.71 (m, 1H)                | 60.7/60.6   | -                                                              | 3.7 (m, 1H)                      | 60.5       | -                                          | 3.68/3.69 (m, 1H)                | 60.4/60.4    | 69.4(A4),                                        |
| A6b | 3.54/3.54 (m, 1H)                | 60.7/60.6   | -                                                              | 3.46 (m, 1H)                     | 60.5       | 77.2(A5)                                   | 3.45/3.45 (m, 1H)                | 60.4/60.4    | 77.0(A5)                                         |

\* Compounds were obtained as position 3 diastereomers. Signals could not be unequivocally assigned.

Table A4: NMR assignments of thunberginol C (9), thunberginol E (10) and thunberginol G (11)

|    | thunberginol C (9)               |            |                                       | thunberginol E (10)              |            |                                            | thunberginol G (11)              |            |                               |
|----|----------------------------------|------------|---------------------------------------|----------------------------------|------------|--------------------------------------------|----------------------------------|------------|-------------------------------|
| No | $\delta_H$ (Multiplicity, J, nH) | $\delta_C$ | HMBC                                  | $\delta_H$ (Multiplicity, J, nH) | $\delta_C$ | HMBC                                       | $\delta_H$ (Multiplicity, J, nH) | $\delta_C$ | HMBC                          |
| 1  | -                                | 169.6      | -                                     | -                                | 169.4      | -                                          | -                                | 169.4      | -                             |
| 3  | 5.54 (dd, 12.1,3.2 Hz, 1H)       | 79.9       | 128.3(2'), 128.3(6'),142.5(10)        | 5.52 (dd, 11.7,3.3 Hz, 1H)       | 79.5       | 113.9(2'), 117.5(6'), 131.1(1'), 142.1(10) | 5.53 (dd, 12.0,3.2 Hz, 1H)       | 80.5       | 114.3(2'),117.9(6'),129.1(1') |
| 4a | 3.27 (dd, 16.6,12.2 Hz, 1H)      | 33.8       | 79.9(3), 100.4(9),107.0(5), 142.5(10) | 3.02 (dd, 16.8,3.3Hz, 1H)        | 33.8       | 79.9(3), 142.1(10)                         | 3.26 (m, 1H)                     | 33.6       | 80.5(3),140.6(10)             |
| 4b | 3.02 (dd, 16.6,3.1 Hz, 1H)       | 33.8       | 100.4(9),107.0(5), 142.5(10)          | 3.2 (dd, 16.8,11.7 Hz, 1H)       | 33.8       | 99.7(9), 107.3(5), 142.1(10)               | 3.06 (dd, 16.6,3.2 Hz, 1H)       | 33.6       | 108.5(9),118.4(5),140.6(10)   |
| 5  | 6.30 (d, 1.8 Hz, 1H)             | 107.0      | 33.8(4), 100.4(9), 101.0(7), 164.6(6) | 6.27 (d, 2.2 Hz, 1H)             | 107.3      | 33.8(4), 99.7(9), 101.1(7)                 | 6.80 (d, 7.4 Hz, 1H)             | 118.4      | 33.6(4),108.5(9),136.3(6)     |
| 6  | -                                | 164.6      | -                                     | -                                | 165.7      | -                                          | 7.45 (dd, 8.4,7.4 Hz, 1H)        | 136.3      | 140.6(10),160.9(8)            |
| 7  | 6.24 (d, 2.2 Hz, 1H)             | 101.0      | 100.4(9), 107.0(5)                    | 6.19 (d, 2.2 Hz, 1H)             | 101.1      | 107.3(5), 163.5(8),165.7(6)                | 6.82 (d, 8.4 Hz, 1H)             | 115.4      | 118.4(5)                      |
| 8  | -                                | 163.5      | -                                     | -                                | 163.5      | -                                          | -                                | 160.9      | -                             |
| 9  | -                                | 100.4      | -                                     | -                                | 99.7       | -                                          | -                                | 108.5      | -                             |
| 10 | -                                | 142.5      | -                                     | -                                | 142.1      | -                                          | -                                | 140.6      | -                             |
| 11 | -                                | -          | -                                     | 3.78 (s, 3H)                     | 55.6       | 147.9(4')                                  | -                                | -          | -                             |
| 1' | -                                | 128.7      | -                                     | -                                | 131.1      | -                                          | -                                | 129.1      | -                             |
| 2' | 7.31 (m, 1H)                     | 128.3      | 79.9(3), 157.8(4')                    | 6.92 (d, 2.1 Hz, 1H)             | 113.9      | 117.5(6'), 147.9(4')                       | 6.82 (m, 1H)                     | 114.3      | 80.5(3)                       |
| 3' | 6.80 (m, 1H)                     | 115.2      | 128.7(1')                             | -                                | 146.5      | -                                          | -                                | 145.2      | -                             |
| 4' | -                                | 157.8      | -                                     | -                                | 147.9      | -                                          | -                                | 145.8      | -                             |
| 5' | 6.80 (m, 1H)                     | 115.2      | 128.7(1')                             | 6.94 (d, 8.3 Hz, 1H)             | 112.0      | 131.1(1'), 146.5(3')                       | 6.69 (m, 1H)                     | 115.4      |                               |
| 6' | 7.31 (m, 1H)                     | 128.3      | 79.9(3), 157.8(4')                    | 6.87 (dd, 8.3,2.1 Hz, 1H)        | 117.5      | 79.5(3), 113.9(2'), 147.9(4')              | 6.69 (m, 1H)                     | 117.9      |                               |

Table A5: NMR assignments of hydrangenol (12) and phyllodulcin (13)

|    | hydrangenol (12)                 |            |                                  | phyllodulcin (13)                |            |                                            |
|----|----------------------------------|------------|----------------------------------|----------------------------------|------------|--------------------------------------------|
| No | $\delta_H$ (Multiplicity, J, nH) | $\delta_C$ | HMBC                             | $\delta_H$ (Multiplicity, J, nH) | $\delta_C$ | HMBC                                       |
| 1  | -                                | 169.3      | -                                | -                                | 169.3      | -                                          |
| 3  | 5.66 (dd, 12.4,3.1 Hz, 1H)       | 80.4       | 128.2(2'), 128.2(6'), 140.5(10)- | 5.65 (dd, 11.9,3.2 Hz, 1H)       | 80.2       | 114.0(2'), 117.6(6'), 130.8(1'), 140.5(10) |
| 4a | 3.40 (dd, 16.6,12.4 Hz, 1H)      | 33.4       | 80.4(3), 140.5(10)               | 3.34 (m, 1H)                     | 33.6       | 80.2(3),140.5(10)                          |
| 4b | 3.13 (dd, 16.6,3.1 Hz, 1H)       | 33.4       | 108.4(9), 118.3(5), 140.5(10)    | 3.15 (dd, 16.6,3.2 Hz, 1H)       | 33.6       | 108.5(9), 118.4(5), 140.5(10)              |
| 5  | 6.87 (d, 7.4 Hz, 1H)             | 118.3      | 33.4(4), 108.4(9)                | 6.87 (m, 1H)                     | 118.4      | 33.6(4),108.5(9), 115.5(7)                 |
| 6  | 7.52 (dd, 8.4,7.4 Hz, 1H)        | 136.2      | 140.5(10),160.9(8)               | 7.52 (dd, 8.4,7.4 Hz, 1H)        | 136.3      | 140.5(10), 160.9(8)                        |
| 7  | 6.90 (d, 8.4 Hz, 1H)             | 115.3      | 108.4(9), 118.3(5), 160.9(8)     | 6.90 (m, 1H)                     | 115.5      | 108.5(9), 118.4(5)                         |
| 8  | -                                | 160.9      | -                                | -                                | 160.9      | -                                          |
| 9  | -                                | 108.4      | -                                | -                                | 108.5      | -                                          |
| 10 | -                                | 140.5      | -                                | -                                | 140.5      | -                                          |
| 11 | -                                | -          | -                                | 3.78 (s, 3H)                     | 55.6       | 148.0(4')                                  |
| 1' | -                                | 128.4      | -                                | -                                | 130.8      | -                                          |
| 2' | 7.34 (m, 1H)                     | 128.2      | 80.4(3), 157.7(4')               | 6.94 (m, 1H)                     | 114.0      | 80.2(3),117.6(6')                          |
| 3' | 6.81 (m, 1H)                     | 115.1      | 128.4(1'), 157.7(4')             | -                                | 146.5      | -                                          |
| 4' | -                                | 157.7      | -                                | -                                | 148.0      | -                                          |
| 5' | 6.81 (m, 1H)                     | 115.1      | 128.4(1'), 157.7(4')             | 6.95 (m, 1H)                     | 112.0      | 130.8(1'), 146.5(3')                       |
| 6' | 7.34 (m, 1H)                     | 128.2      | 80.4(3), 157.7(4')               | 6.89 (m, 1H)                     | 117.6      | 80.2(3), 114.0(2'), 148.0(4')              |

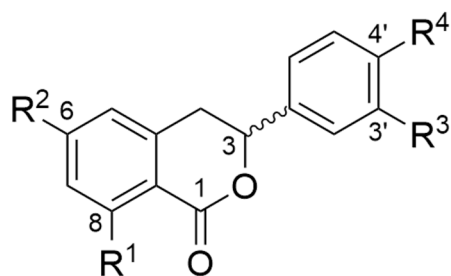

Hydrangenol-8-O-Glc (**1**) R1: O- $\beta$ -Glc, R2: H, R3: H, R4: OH  
 Thunberginol G-3'-O-Glc (**2**) R1: OH, R2: H, R3: O- $\beta$ -Glc, R4: OH  
 Phyllodulcin-8-O-Glc (**3**) R1: O- $\beta$ -Glc, R2: H, R3: OH, R4: OMe  
 Hydrangenol-4'-O-Glc (**4**) R1: OH, R2: H, R3: H, R4: O- $\beta$ -Glc  
 Phyllodulcin-3'-O-Glc (**5**) R1: OH, R2: H, R3: O- $\beta$ -Glc, R4: OMe  
 Thunberginol C-8-O-Glc (**6**) R1: O- $\beta$ -Glc, R2: OH, R3: H, R4: OH  
 Thunberginol E-6-O-Glc (**7**) R1: OH, R2: O- $\beta$ -Glc, R3: OH, R4: OMe  
 Thunberginol D-6-O-Glc (**8**) R1: OH, R2: O- $\beta$ -Glc, R3: OH, R4: OH  
 Thunberginol C (**9**) R1: OH, R2: OH, R3: H, R4: OH  
 Thunberginol E (**10**) R1: OH, R2: OH, R3: OH, R4: OMe  
 Thunberginol G (**11**) R1: OH, R2: H, R3: OH, R4: OH  
 Hydrangenol (**12**) R1: OH, R2: H, R3: H, R4: OH  
 Phyllodulcin (**13**) R1: OH, R2: H, R3: OH, R4: OMe

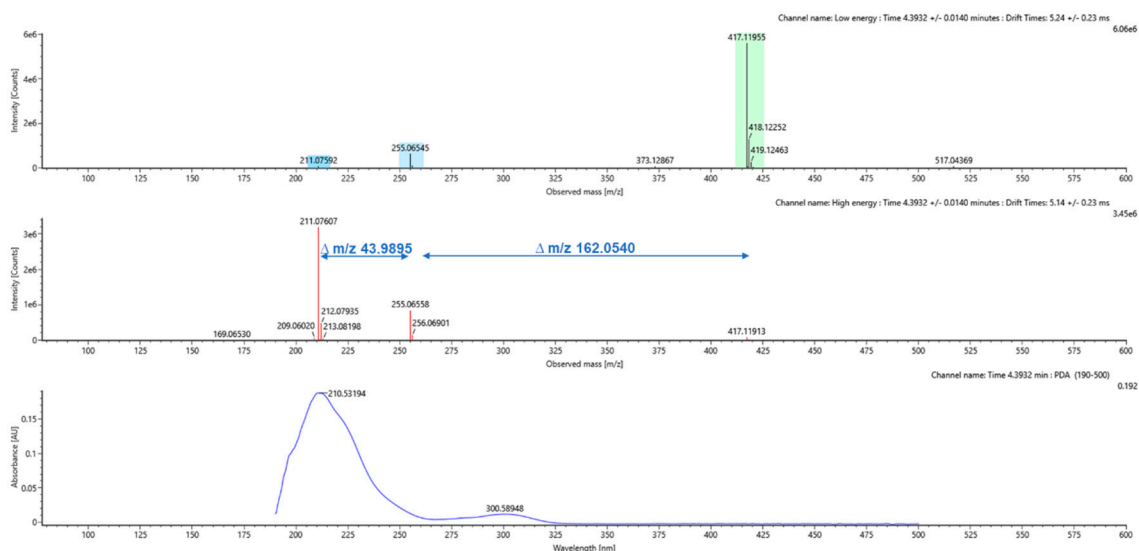

Figure A1: mass and UV-spectra of hydrangenol 8-O-glc (**1**)

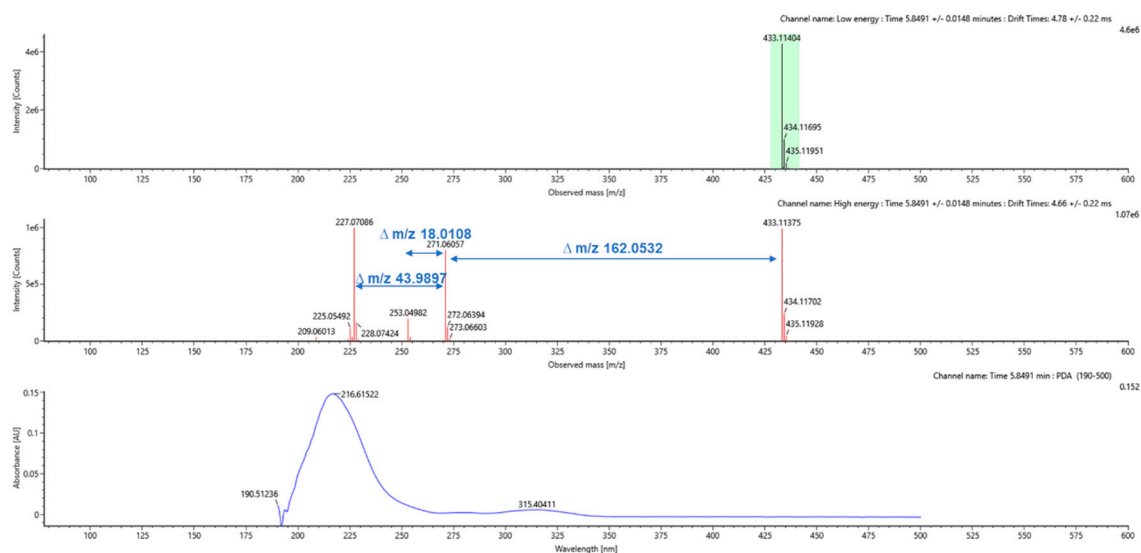

Figure A2: mass and UV-spectra of thunberginol G-3'-O-glc (2)

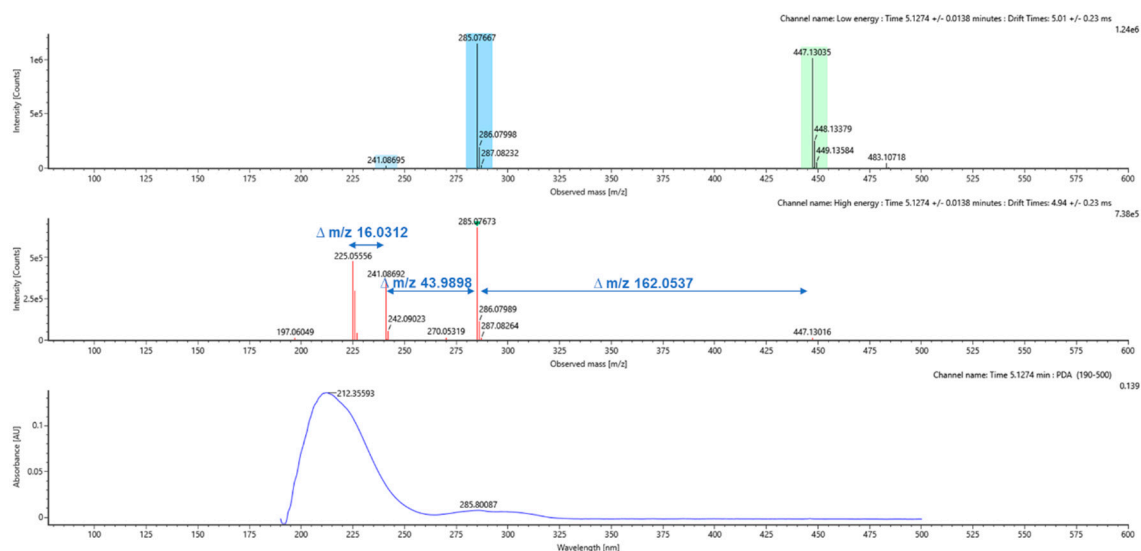

Figure A3: mass and UV-spectra of phyllodulcin 8-O-glc (3)

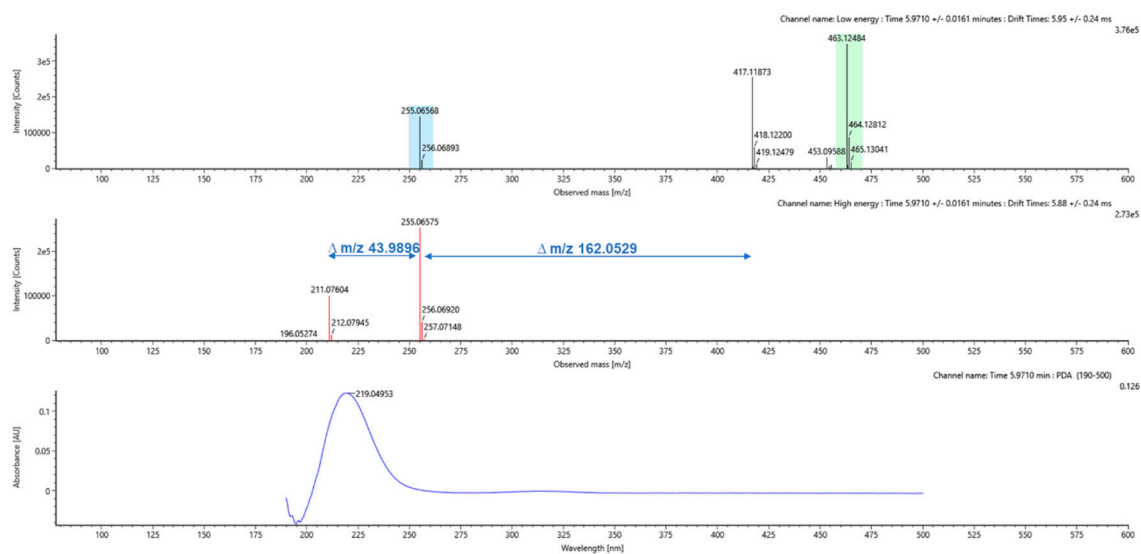

Figure A4: mass and UV-spectra of hydrangenol 4'-O-glc (4)

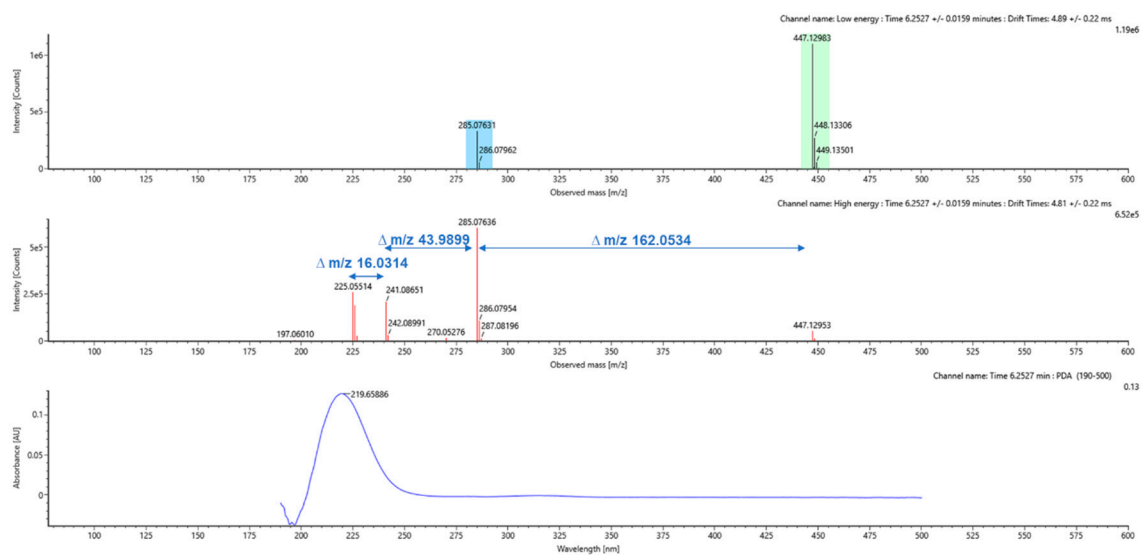

Figure A5: mass and UV-spectra of phyllodulcin 3'-O-glc (5)

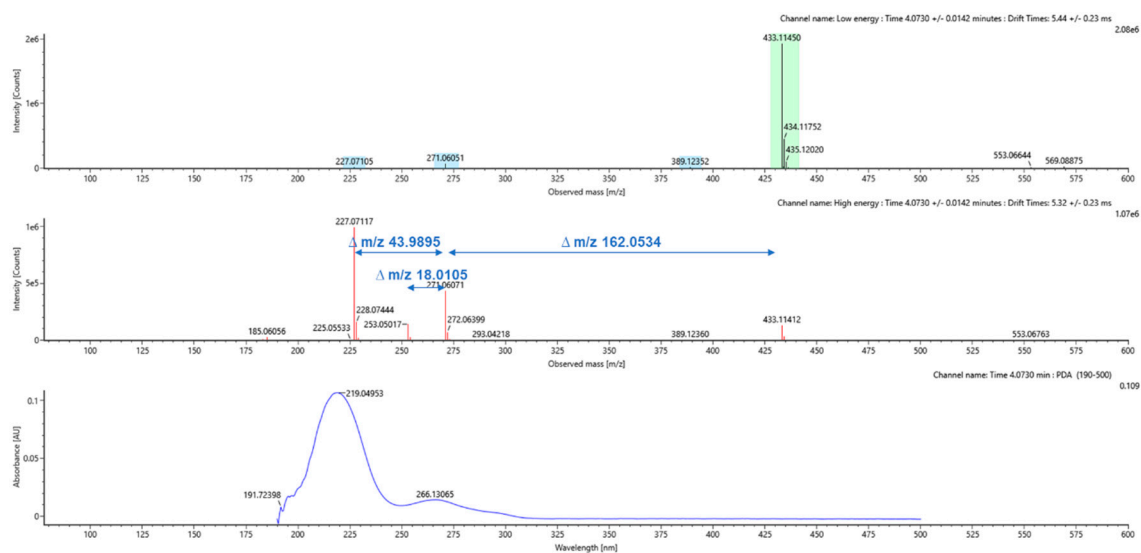

Figure A6: mass and UV-spectra of thunberginol C-8-O-glc (6)

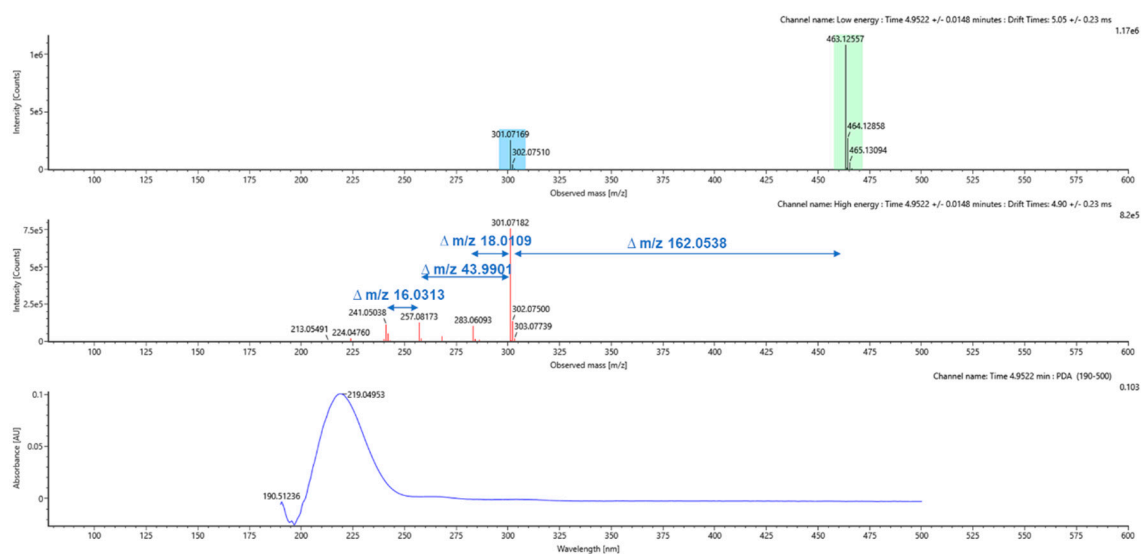

Figure A7: mass and UV-spectra of thunberginol E-6-O-glc (7)

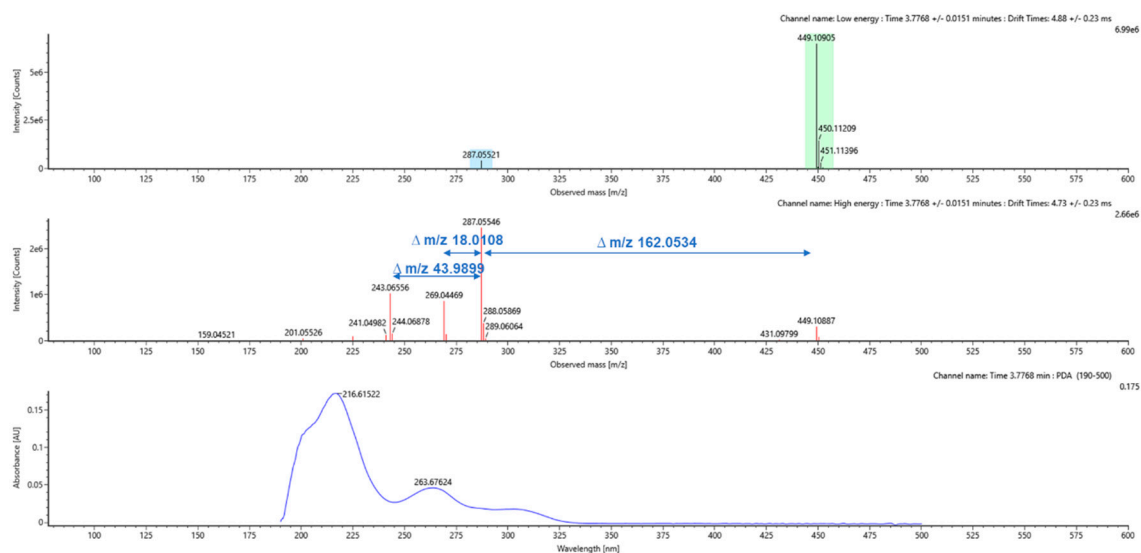

Figure A8: mass and UV-spectra of thunberginol D-6-O-glc (8)

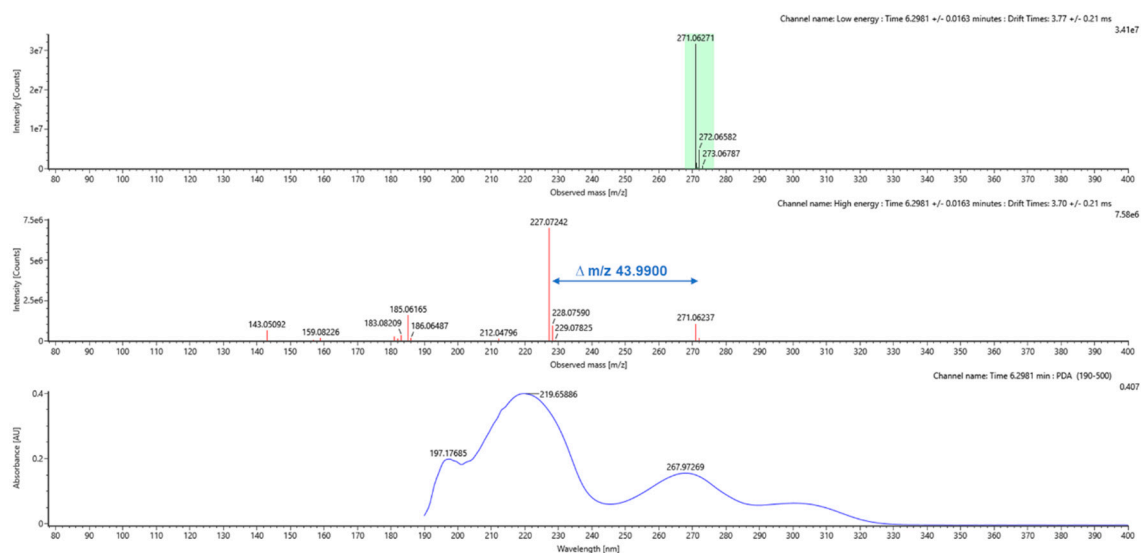

Figure A9: mass and UV spectra of thunberginol C (9)

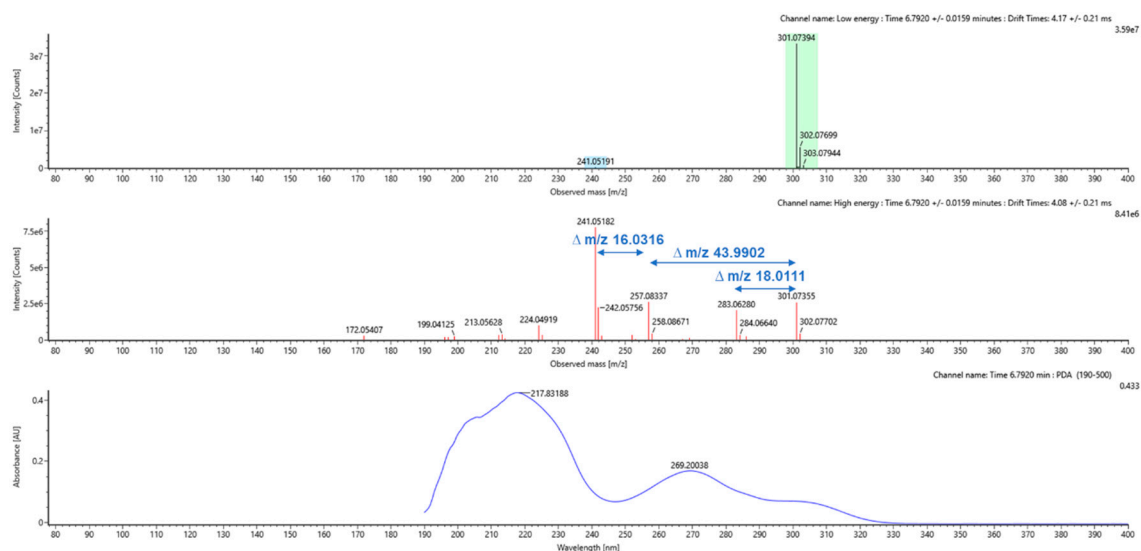

Figure A10: mass and UV spectra of thunberginol E (10)

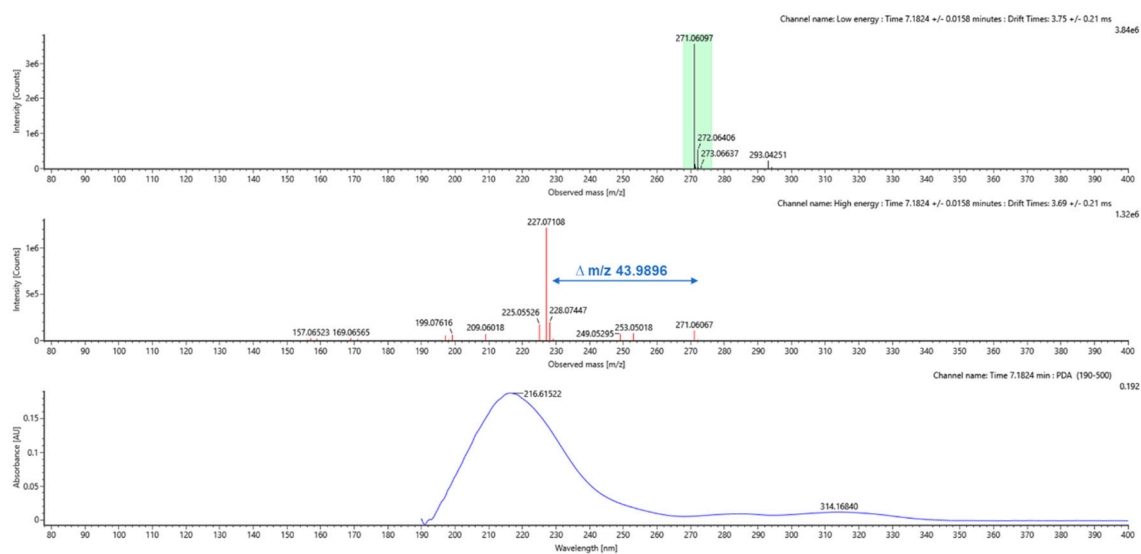

Figure A11: mass and UV-spectra of thunberginol G (11)

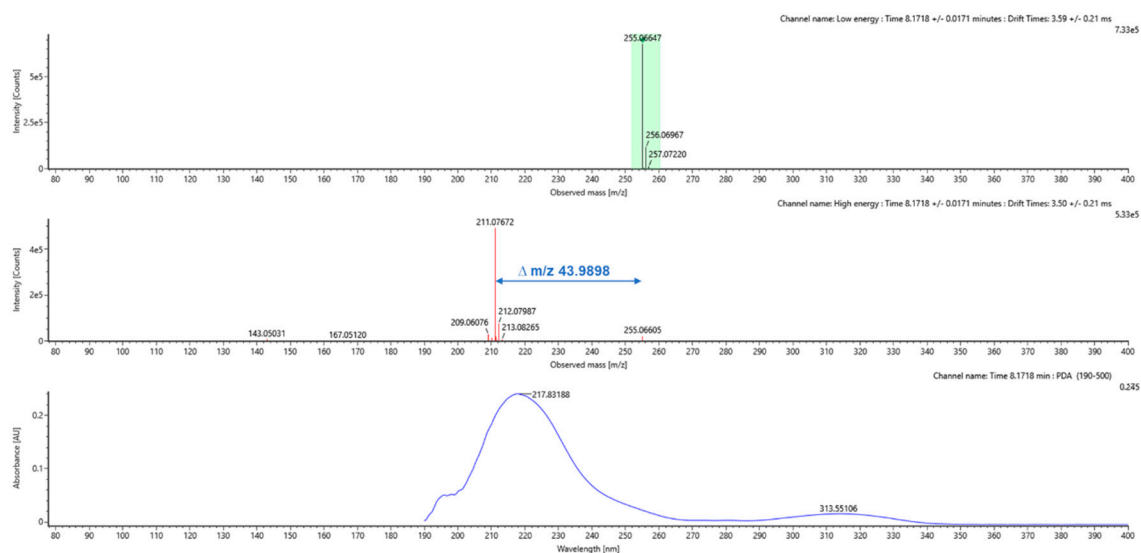

Figure A12: mass and UV-spectra of hydrangenol (12)

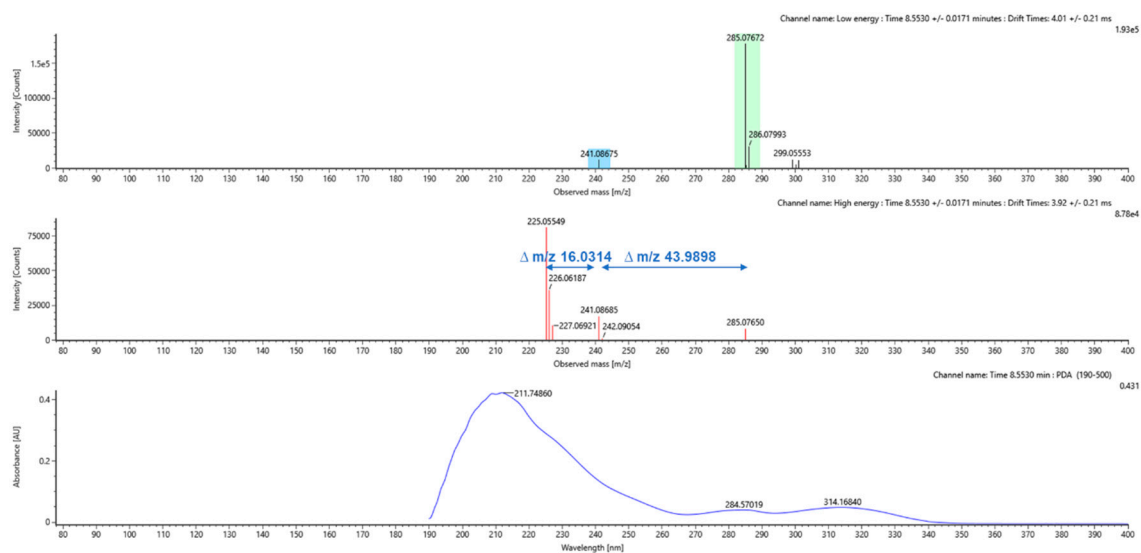

Figure A13: mass and UV-spectra of phyllodulcin (13)
