# Supplementary material for: Separation of Dihydro-Isocoumarins and Dihydro-Stilbenoids from Hydrangea macrophylla ssp. serrata by Use of Counter-Current Chromatography
Source: MDPI journal article supplement (doi:10.3390/molecules27113424), 2022-05-26
Supplement: s1 [file s1]

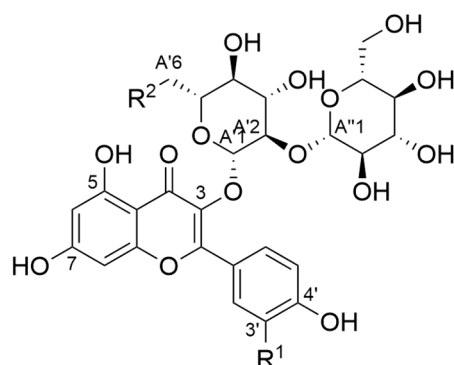

quercetin-3-O-(alpha-1,6-rahmno)pyranosyl)-sophoroside (**24**) R1: OH, R2: -O- $\alpha$ -Rha

quercetin-3-O-sophoroside (**25**) R1: OH, R2: OH

kaempferol-3-O-sophoroside (**26**) R1: H, R2: OH

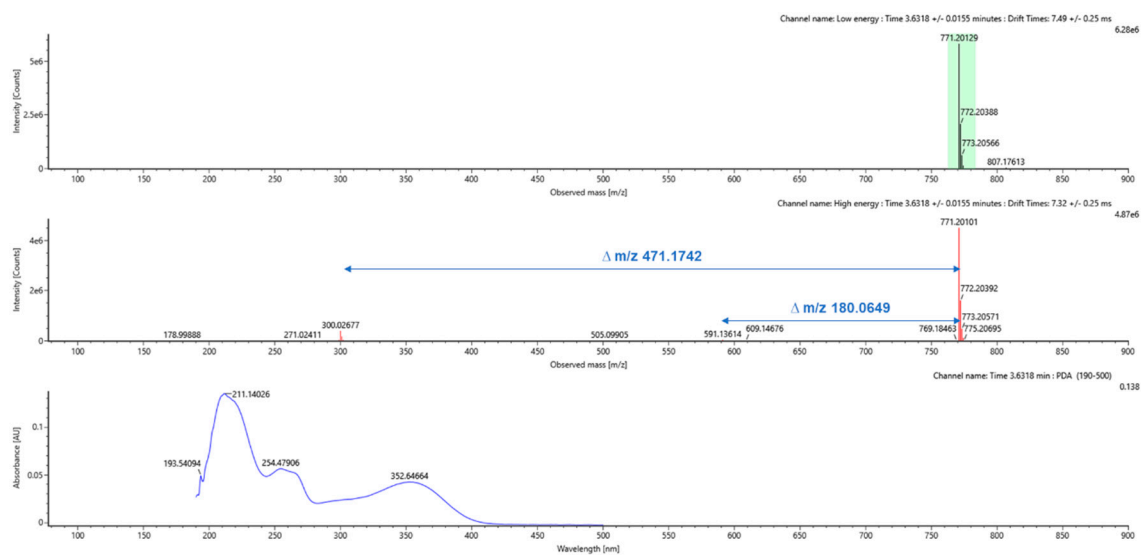

Figure F1: mass and UV-spectra of quercetin-3-O-(alpha-1,6-rahmno)pyranosyl)-sophoroside (24)

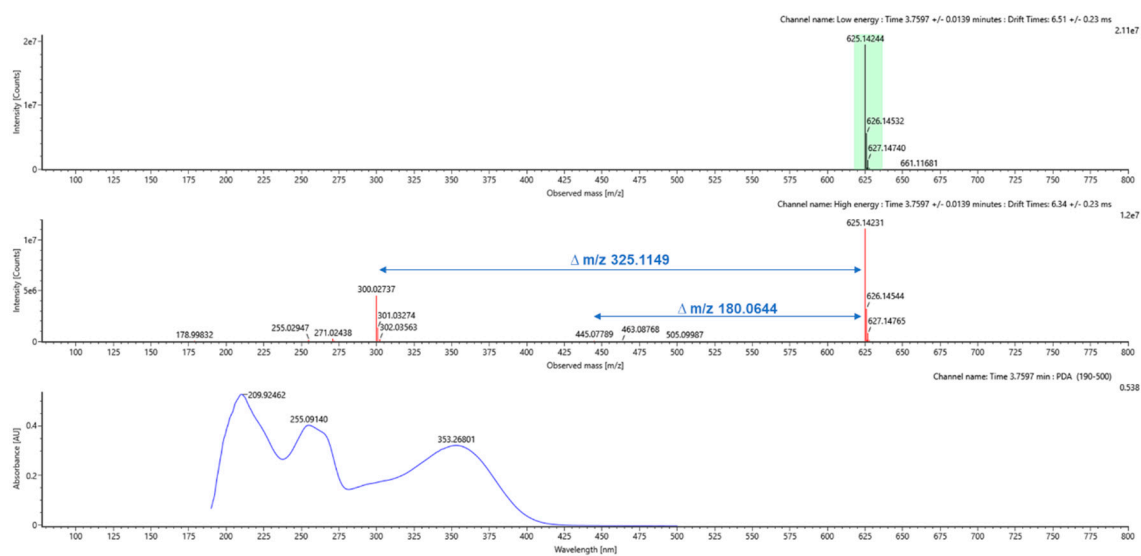

Figure F2: mass and UV-spectra of quercetin-3-O-sophoroside (25)

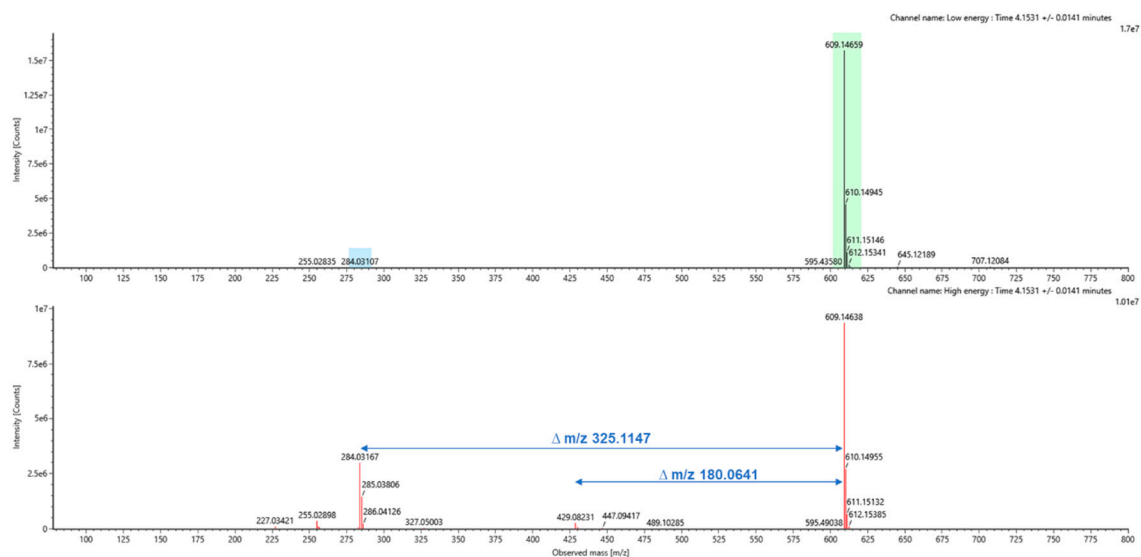

Figure F3: mass spectra of kaempferol-3-O-sophoroside (26)
